1    **The low complexity regions in the C-terminus are essential for the**  
2                   **subcellular localisation of *Leishmania* casein kinase 1**  
3                                   **but not for its activity**

4  
5    Daniel MARTEL<sup>1,2</sup>, Stewart PINE<sup>1</sup>, Katharina BARTSCH<sup>3</sup>, Joachim CLOS<sup>3</sup>, Gerald F. SPÄTH<sup>1</sup>, and  
6    Najma RACHIDI<sup>1\*</sup>.

7    <sup>1</sup> Institut Pasteur and INSERM U1201, Unité de Parasitologie moléculaire et Signalisation, Paris,  
8    France; <sup>2</sup> Université Paris Diderot, Sorbonne Paris Cité, Paris, France; <sup>3</sup> Bernhard Nocht Institute for  
9    Tropical Medicine, Hamburg, Germany.

10

11    Running Title: *Casein Kinase 1 localisation* requires its C-terminus.

12    \*To whom correspondence should be addressed: Najma Rachidi. Institut Pasteur and INSERM U1201,  
13    Unité de Parasitologie Moléculaire et Signalisation, Paris, France. Tel: +33144389231; Fax:  
14    +330145688332; E-mail: [najma.rachidi@pasteur.fr](mailto:najma.rachidi@pasteur.fr)

15

16    **Keywords** : Casein kinase I; flagellum; nucleolus; mitotic spindle; Low complexity regions; C-  
17    terminus; *Leishmania*.

18

19

20

21

22

23

## 24 **Abstract**

25 Casein Kinase 1 (CK1) family members are serine/threonine protein kinases ubiquitously expressed in  
26 eukaryotic organisms. They are involved in a wide range of important cellular processes, such as  
27 membrane trafficking, or vesicular transport in organisms from yeast to humans. Due to its broad  
28 spectrum of action, CK1 activity and expression is tightly regulated by a number of mechanisms,  
29 including subcellular sequestration. Defects in CK1 regulation, localisation or the introduction of  
30 mutations in the CK1 coding sequence are often associated with important diseases such as cancer.  
31 Increasing evidence suggest that the manipulation of host cell CK1 signalling pathways by  
32 intracellular pathogens, either by exploiting the host CK1 or by exporting the CK1 of the pathogen  
33 into the host cell may play an important role in infectious diseases. *Leishmania* CK1.2 is essential for  
34 parasite survival and released into the host cell, playing an important role in host pathogen  
35 interactions. Although *Leishmania* CK1.2 has dual role in the parasite and in the host cell, nothing is  
36 known about its parasitic localisation and organelle-specific functions. In this study, we show that  
37 CK1.2 is a ubiquitous kinase, which is present in the cytoplasm, associated to the cytoskeleton and  
38 localised to various organelles, indicating potential roles in kinetoplast and nuclear segregation, as  
39 well as ribosomal processing and motility. Furthermore, using truncated mutants, we show for the first  
40 time that the two low complexity regions (LCR) present in the C-terminus of CK1.2 are essential for  
41 the subcellular localisation of CK1.2 but not for its kinase activity, whereas the deletion of the N-  
42 terminus leads to a dramatic decrease in CK1.2 abundance. In conclusion, our data on the localisation  
43 and regulation of *Leishmania* CK1.2 contribute to increase the knowledge on this essential kinase and  
44 get insights into its role in the parasite.

## 45 **Introduction**

46 Casein Kinase 1 (CK1) family members are serine/threonine protein kinases ubiquitously expressed in  
47 eukaryotic organisms [1]. They are involved in a wide range of important cellular processes, such as  
48 membrane trafficking, or vesicular transport in organisms from yeast to humans [1]. Due to its broad  
49 spectrum of action, CK1 activity and expression are tightly regulated by a number of mechanisms,  
50 including subcellular sequestration or phosphorylation [1]. Defects in CK1 regulation, localisation or

51 the introduction of mutations in the CK1 coding sequence are often associated with important diseases  
52 such as cancer [2] [3] [4]. Consistent with its various roles, members of the CK1 family are associated  
53 with many subcellular structures. In mammalian cells, CK1 $\delta$  has been detected at the centrosomes and  
54 the *trans*-Golgi network, performing an important role as a mediator of ciliogenesis [5, 6]. CK1 $\delta$  as  
55 well as CK1 $\alpha$  interact with membrane structures of the endoplasmic reticulum, the Golgi and various  
56 transport vesicles [5] [7]. In budding yeast, ScHrr25/CK1 $\delta$  is localised to the bud neck, where it is  
57 essential for proper cytokinesis, and to endocytic sites, where it is required for their initiation and  
58 stabilisation [8] [9] [10]. Lastly, ScHrr25/CK1 $\delta$  is recruited to cytoplasmic processing bodies (P-  
59 bodies), which protects the active kinase from the cytoplasmic degradation machinery during stress  
60 [11]. These few examples reflect the tight association of CK1 localisation to its functions, suggesting  
61 that investigating its localisation may increase our knowledge on this kinase and allow the  
62 identification of potential novel functions.

63 Increasing evidence suggests that the manipulation of host cell CK1 signalling pathways by  
64 intracellular pathogens, either by exploiting host CK1 or by exporting the CK1 of the pathogen into  
65 the host cell might play an important role in infectious diseases [12] [13] [14] [15] [16]. Indeed, host  
66 CK1 pathways are vital for *Mycobacterium* [15]. Knockdown of host CK1 leads to the decrease of  
67 infectious bursal disease virus (IBDV) replication [17]. The relationship between CK1 and viral  
68 replication was also demonstrated for other viruses, such as Simian Virus 40, hepatitis C virus and  
69 yellow fever virus [18, 19] [20]. *Plasmodium falciparum* CK1 is essential for parasite survival as well  
70 as released into the host cell [21]. Indeed, PfCK1 has a role in invasion through its interaction with and  
71 phosphorylation of PfRON3 (RhOptry Neck protein 3), which is located in the rhoptries [12].  
72 *Leishmania* CK1.2 is also essential for parasite survival and was identified in exosomes [13] [22].  
73 Thus, *Leishmania*, as the causative agent of Leishmaniasis, represents an excellent model to study the  
74 cellular roles of CK1. This parasite has two developmental stages, an extracellular promastigote that  
75 proliferated inside the insect vector, and an intracellular amastigote that develops and multiply inside  
76 the phagolysosomes of macrophages. There are six members of the CK1 family in *Leishmania* and  
77 little is known about their localisation or functions as only two paralogs were studied: CK1.4 and  
78 CK1.2. CK1.4 is mainly localised in the cytoplasm, and unlike other *Leishmania* CK1s contains a

79 putative secretion signal. This paralog, secreted by the parasite was shown to be important for  
80 virulence [23]. CK1.2 is the major CK1 paralog, the most conserved kinase in *Leishmania spp.* and the  
81 most closely related to its human orthologs, suggesting that it might have been selected by the host cell  
82 rather than by the parasite. Lastly, *Leishmania* CK1.2, released in the host cell as free protein or via  
83 exosomes was shown to phosphorylate the host IFNAR1 (a receptor for alpha/beta interferon), leading  
84 to its degradation and the attenuation of the cellular responses to IFN- $\alpha$ , mimicking human CK1 $\alpha$  [22,  
85 24, 25] [26]. These data suggest that *Leishmania* CK1.2 phosphorylates host proteins to subvert  
86 macrophages and favours parasite survival, making this kinase a key player in host-pathogen  
87 interactions. Despite its essential role in parasite viability and virulence through its dual role in  
88 parasite and host cell, nothing is known about the functions of CK1.2 in the parasite [13] [25].  
89 In this study, we show that CK1.2 is a ubiquitous protein kinase, present in the cytoplasm and  
90 associated to the cytoskeleton. In addition, CK1.2 localises to various organelles, such as the basal  
91 body, the flagellum, and the nucleolus, suggesting potential functions in the regulation of kinetoplast  
92 and nuclear segregation and/or ribosomal processing. Furthermore, using truncated mutants, we show  
93 for the first time that the two low complexity regions (LCR) present at the C-terminus of CK1.2 are  
94 essential for the subcellular localisation of CK1.2 but not for its kinase activity, whereas the deletion  
95 of the N-terminus leads to a dramatic decrease in CK1.2 abundance. In conclusion, our data give new  
96 insights into the roles of *Leishmania* CK1.2 in the parasite.

97

## 98 **Results**

### 99 ***Leishmania* CK1.2 localisation is ubiquitous**

100 To investigate the localisation of CK1.2 in promastigotes, *Leishmania donovani* parasites expressing  
101 an episomal copy of CK1.2 tagged with V5-His<sub>6</sub> at the C-terminus (CK1.2-V5) were used [13]. This  
102 cell line was validated in a previous study by showing that CK1.2-V5 is active, and functional as it  
103 compensates for a decrease of endogenous CK1.2 activity [13] indicating that ectopic CK1.2-V5 is  
104 properly folded. Immunofluorescence assays of parasites fixed with paraformaldehyde (PFA) were  
105 performed revealing intense punctate staining in the cytoplasm, the nucleus and the flagellum (Fig.

106 **1A**). The control parasites expressing the empty vector only showed weak background fluorescence  
107 (**Fig. 1B**). Indeed the sum of the fluorescence intensity in the cellular body of parasites expressing  
108 CK1.2-V5 ( $1\,712\,899 \pm 85\,178$ ,  $n=256$ ) was significantly higher than that of the control ( $893\,556 \pm 16$   
109  $256$ ,  $n=154$ ) (**Fig. 1C**), suggesting that this punctate staining is specific to CK1.2-V5. This pattern is  
110 characteristic of the localisation of human CK1s [27]. As the cytoplasmic staining of CK1.2 could  
111 mask specific localisations, promastigotes were treated with 0,125% NP-40 to permeabilise  
112 membranes and facilitate the release of cytoplasmic proteins, prior to PFA fixation and staining. The  
113 treatment condition was selected after optimisation steps performed to minimise the impact of the  
114 detergent on the nucleus and kinetoplast (data not shown). We detected a signal (i) adjacent to the  
115 kinetoplast (**Fig. 1D, CK1.2-V5**) (ii) in the flagellar pocket region and along the flagellum and (iii) in  
116 the Hoechst-unstained region of the nucleus (**Fig. 1D, CK1.2-V5**). These signals were reproducibly  
117 observed in all the samples that were analysed. CK1.2-V5 specific localisation was confirmed using  
118 methanol treatment at different incubation times (as an example: 3 min, **Figure S1A**), ruling out the  
119 possibility that it could be an artefact of detergent treatment. To confirm these observations, co-  
120 localisation studies were performed with organelles-specific markers.

121

## 122 **CK1.2 localises to the basal body and the flagellum**

123 To investigate the localisation of CK1.2-V5 to the basal body [28], we used a specific marker, centrin-  
124 4 that localises to this organelle (**Fig. 2A, CEN, white arrow**) as well as to the bilobe structure (**Fig.**  
125 **2A, CEN, yellow arrow**) [29] [30]. CK1.2-V5 co-localises with centrin-4 to the basal bodies (**Fig. 2B**  
126 **panel a, white arrows**) as measured by a mean Pearson coefficient (mPc of  $0.741 \pm 0.050$  above 0.5,  
127 **Fig. 2C**), but not to the bilobe structure (**Fig. 2B panel a, yellow arrow** and **Fig. 2C**,  $mPc=0.47 \pm$   
128  $0.074$ ). CK1.2 does not seem to have functions in the kinetoplast, as the kinase does not co-localise  
129 with the kinetoplast DNA ( $mPc=0.27 \pm 0.164$ , **Fig. 2C**). Clearly, CK1.2 is not restricted to the basal  
130 bodies. Indeed, as judged by **Figure 2B (panel b, white arrow)** and confirmed by an mPc of  $0,805 \pm$   
131  $0,06$  (**Fig. 2C**), CK1.2-V5 co-localises with IFT172 at the transition fibers, suggesting that the protein  
132 kinase crosses the transition zone to enter into the flagellum. CK1.2-V5 localises to the axoneme

133 similarly to IFT172 (Figure 2D, Merge and 3D-view), but not to the paraflagellar rod (PFR2, Fig. 2E,  
134 panel 3). These findings suggest that CK1.2 is perfectly located (i) to regulate basal body functions  
135 such as the coordination of kinetoplast/basal body segregation, and (ii) to cross the transition zone and  
136 access the flagellum.

137

### 138 **CK1.2 co-localises with Hsp90 and Hsp70 to the flagellar pocket**

139 As shown Figure 2E (CK1.2-V5, white arrow), CK1.2-V5 is detected in the flagellar pocket (FP),  
140 which is important for processes such as exo/endocytosis or flagellum assembly [31]. The FP is also  
141 one of the sites of exosome excretion in *Trypanosoma brucei* [32]. Exosomes are vesicles of  
142 endosomal origin released by cells from multi-vesicular bodies into their extracellular environment  
143 and known to promote cell-to-cell communications [33]. CK1.2 was identified in *Leishmania*  
144 exosomes by proteome analyses, suggesting a role of this kinase in the host cell [24] [22]. Two other  
145 proteins are known to be exosomal protein cargos, Hsp90 and Hsp70. In human, these two chaperones  
146 are phosphorylated by human CK1 to control the balance between folding and degradation [34].  
147 Likewise, *Leishmania* CK1.2 was recently shown to phosphorylate *Leishmania* Hsp90 [35] [34]. To  
148 investigate whether CK1.2 co-localises with Hsp90 and Hsp70 to the flagellar pocket, we performed  
149 immunofluorescence microscopy using detergent treatment to remove the cytoplasmic fraction of  
150 these chaperones.

151 *CK1.2 co-localises with Hsp90 to the flagellar pocket neck.* Most of Hsp90 was removed upon  
152 detergent treatment, indicating that the major fraction of Hsp90 is cytoplasmic (Fig. S2A). The small  
153 remaining pool of Hsp90 was associated with the flagellar pocket neck, where it co-localised with  
154 CK1.2-V5 (Fig. 3A, panel c) as confirmed by a mPc above 0.5 (Fig. 3B). The two proteins seem to  
155 form a horseshoe shaped structure as judged by the 3D view (Fig. 3C). These findings suggest that  
156 CK1.2 and Hsp90 may have specific functions linked to endo- or exocytosis, as the flagellar pocket  
157 neck is the site of endocytosis regulation [36]. Alternatively, they could be implicated in the regulation  
158 of the FAZ proteins, such as FAZ10 that has a similar localisation [37].

159 *CK1.2 co-localises with Hsp70 to the basal body, the flagellar pocket and flagellar tip and*  
160 *phosphorylates Hsp70.* Cytoplasmic Hsp70 was removed upon detergent treatment (Fig. S2B and 3D).  
161 The remaining fraction of Hsp70 co-localises with CK1.2-V5 to the flagellum, the flagellar tip, the  
162 flagellar pocket, and the basal body, as confirmed by the mPc above 0.5 (Fig. 3D, merge and 3E). In  
163 fact, Hsp70 co-localises with CK1.2-V5 across the whole parasite (Fig. 3E, whole parasite), which  
164 was not observed for Hsp90 (Fig. 3B, WP). Hsp70 might thus be one of the main interactors of CK1.2.  
165 To investigate whether CK1.2 regulates Hsp70, kinase assays were performed using recombinant  
166 CK1.2-V5 and Hsp70 (Fig. 3F). The incorporation of <sup>32</sup>P in Hsp70 in the presence of CK1.2-V5  
167 indicates that Hsp70 is a substrate of CK1.2, similarly to its human orthologs. This result is further  
168 supported by the loss of phosphorylation following the addition of D4476, a specific inhibitor of  
169 CK1.2 [13]. We excluded the possibility that the phosphorylation was due to the ATPase activity of  
170 Hsp70, as no phosphorylation was detected in the absence of the kinase. These data suggest that  
171 Hsp70 may be regulated by CK1.2-mediated phosphorylation, explaining the co-localisation of both  
172 proteins.

173

#### 174 **CK1.2 is localised in the granular zone of the nucleolus and redistributed to the mitotic** 175 **spindle during mitosis.**

176 As shown Figure 1D, CK1.2-V5 was detected in a sub-nuclear location unstained by Hoechst,  
177 corresponding to the nucleolus. To ascertain this hypothesis, the localisation of CK1.2-V5 in  
178 detergent-treated promastigotes was compared to that of L1C6 antibody, which specifically recognises  
179 an unknown nucleolar protein [38]. The L1C6-targeted antigen was detected in the centre of the  
180 Hoechst-unstained area in the nucleus corresponding to the dense fibrillar zone of the nucleolus and  
181 thought to be involved in rDNA transcription (Fig. 4A, merged image-red staining; Fig. S3A) [39]. In  
182 contrast, CK1.2-V5 was detected at the periphery of the nucleolus, as dotted staining around L1C6  
183 (Fig. 4A, merged image, green staining; Fig. S3A). This localisation corresponds to the granular  
184 component of the nucleolus, which contains mainly RNA and is thought to be involved in the last  
185 steps of rRNA processing and ribosome biogenesis. Thus, CK1.2 might be involved in rRNA

186 processing rather than in rDNA transcription, which is a novel finding for CK1 family members.  
187 Furthermore, in dividing cells the staining of CK1.2 elongates from a wheel-shaped to a bar-shaped  
188 form that reaches both ends of the cell, similarly to the nucleolar region but unlike L1C6 staining (Fig.  
189 4B, CK1.5-V5, H and L1C6; Fig. S3A). Instead, L1C6 antigen follows the classical segregation  
190 pattern described for nucleolar components (Fig. 4B, L1C6; Fig. S3A) [40]. As shown in Figure 4C  
191 panel a and Figure S3B, CK1.2-V5 also co-localises with the mitotic spindle in specific areas,  
192 observation confirmed by the mPc above 0.5 (Fig. 4D, mitotic spindle (reduced)). During anaphase,  
193 CK1.2-V5 is localised at each end of the elongated mitotic spindle (Fig. 4C panel d; Fig. S3B),  
194 similarly to the twinfilin-like protein [41]. These findings suggest that CK1.2 may be involved in  
195 cytokinesis or in the regulation of chromosome segregation [41]. Evidence from other eukaryotes  
196 support such a role for CK1 in mitosis and its recruitment to the spindle [42]. The mitotic spindle co-  
197 localises also with the nucleolus, suggesting that nucleolar proteins could be involved in chromosome  
198 segregation in the absence of visible centrosomes. Similar processes have been described in  
199 *Trypanosoma brucei* [43]. Thus, CK1.2 might be yet another nucleolar protein that relocates from the  
200 nucleolus to the mitotic spindle during mitosis.

201

### 202 **CK1.2 has a similar localisation in axenic amastigotes than in promastigotes**

203 In PFA-fixed axenic amastigotes, the localisation of CK1.2-V5 is similar to that observed in  
204 promastigotes with intense fluorescent dots in the cytoplasm and at the flagellar tip (Fig. 5A, white  
205 arrows). In detergent treated or untreated axenic amastigotes, CK1.2-V5 localises to similar structures  
206 as observed in promastigotes (Fig. 5B). In contrast to untreated axenic amastigotes, in detergent-  
207 treated axenic amastigotes CK1.2-V5 seems to be excluded from the flagellar tip and restricted to the  
208 flagellar pocket neck, where it forms a horseshoe-shaped structure as judged by Figure 5C (panel b,  
209 green staining). Indeed, in PFA, CK1.2 was detected at the flagellar tip of 82% of CK1.2 positive  
210 cells, whereas in detergent, it was detected in only 8% of CK1.2 positive cells. This result suggests  
211 that CK1.2 is not associated with the cytoskeleton at the flagellar tip in contrast to what has been  
212 observed in promastigotes.



213 CK1.2 displays multiple localisation patterns, which are likely to be associated with pleiotropic  
214 functions. How *Leishmania* CK1.2 is targeted to these different localisations remains to be  
215 investigated, especially considering that there are no specific motifs, apart from a non-functional  
216 nuclear localisation signal [1]. Furthermore, *Leishmania* CK1.2 is constitutively active, contrary to  
217 human CK1 $\delta$ ,  $\epsilon$  and to a lesser extent CK1 $\alpha$ , thus probably requires tighter regulation mechanisms to  
218 avoid inappropriate phosphorylation of its substrates [13] [1].

219

### 220 **The low complexity regions are essential for *Leishmania* CK1.2 localisation**

221 In higher eukaryotes, the activity and localisation of CK1 are mainly regulated through its N- and C-  
222 terminal domains [1, 44]. Among *Leishmania* CK1 paralogs, CK1.2 and CK1.1 are highly similar but  
223 differ in their N- and C-terminus, which might explain the differences in regulation and localisation  
224 [13, 45]. In contrast to CK1.1, CK1.2 is released into the host cell via exosomes and is essential for  
225 parasite survival [13, 22, 24]. N- and C-terminal truncations of CK1.2 were thus generated, based on  
226 the alignment with CK1.1 to determine the importance of these domains for the localisation and  
227 regulation of CK1.2 [45]. As shown in **Figure 6A**, the three truncated CK1.2 proteins were (i) lacking  
228 the last ten amino acids (aa) at the C-terminus (CK1.2 $\Delta$ C10), (ii) lacking the last 43 aa at the C-  
229 terminus (CK1.2 $\Delta$ C43), or (iii) lacking the first seven aa at the N-terminus (CK1.2 $\Delta$ N7). To test  
230 whether these mutants were still active kinases [44], recombinant mutants proteins were expressed and  
231 used to perform a kinase assay with MBP, a canonical substrate for CK1.2 [13]. CK1.2, CK1.2 $\Delta$ C10,  
232 CK1.2 $\Delta$ C43 and CK1.2 $\Delta$ N7 were equally active, as demonstrated by the incorporation of  $^{32}$ P into  
233 MBP (**Fig. 6B, top panel**). This finding indicates that the N- or the C-terminal domains are not  
234 essential for the activity of CK1.2. Next, promastigotes were transfected with a pLEXSY plasmid  
235 empty (control) or containing CK1.2, CK1.2 $\Delta$ C10, CK1.2 $\Delta$ C43, CK1.2 $\Delta$ N7 genes. The expression of  
236 the three truncated proteins was analysed by Western blot analysis (**Fig. 6C**). CK1.2 $\Delta$ C10-V5 and  
237 CK1.2 $\Delta$ C43-V5 levels were similar to that of CK1.2-V5, whereas the level of CK1.2 $\Delta$ N7 was lower  
238 (**Fig. 6C**). At least two hypotheses could explain the low abundance of CK1.2 $\Delta$ N7, either the deletion  
239 of the N-terminus leads to structural instability or to degradation. We excluded the first possibility,  
240 since CK1.2 $\Delta$ N7 was easily produced as an active recombinant kinase in bacteria (**Fig. 6B, bottom**

241 panel). To test the second hypothesis, transgenic parasites expressing CK1.2 $\Delta$ N7 were treated with  
242 Mg132, a proteasome inhibitor. The level of CK1.2 $\Delta$ N7 as well as that of CK1.2 and the other mutants  
243 were similar in presence or absence of Mg132 (Fig. S4A panel a). The treatment of mutants was  
244 sufficient to block proteasomal degradation, as the level of ubiquitinated proteins was increased in  
245 presence of Mg132 (Figure S4A panel b). We next investigated whether the CK1.2 $\Delta$ N7 may be  
246 degraded in the lysosomes. To this end, transgenic parasites were treated with ammonium chloride  
247 (NH<sub>4</sub>Cl), which increases the pH in the lysosome rendering hydrolase inactive [46]. The level of  
248 CK1.2 $\Delta$ N7 remains low (Figure S4B panel a) despite the inhibition of lysosomal proteases as judged  
249 by the alkalinisation of the lysosome by NH<sub>4</sub>Cl and by the decrease in LysoTracker fluorescence  
250 intensity, which stains acidic compartments (Figure S4B panel b). The low level of CK1.2 $\Delta$ N7 protein  
251 is thus not the consequence of proteasomal, lysosomal degradation or autophagy, which is ultimately a  
252 lysosome-mediated degradation [47]. Cathepsin B- or calpain-like cysteine peptidase-mediated  
253 degradation were excluded, as Mg132 also inhibits these proteases [48].

254 To assess the importance of the N- and C-terminal domains for CK1.2 localisation,  
255 immunofluorescence studies were performed either on PFA-fixed cells or on detergent-treated PFA-  
256 fixed cells as previously described. To take into consideration the heterogeneity of CK1.2-V5 staining  
257 (Fig. 1C), the sum fluorescence of each parasite was measured and that of the WT was compared to  
258 that of the three mutant parasites. No statistically significant differences could be measured between  
259 CK1.2, and CK1.2 $\Delta$ C10 or CK1.2 $\Delta$ C43, in PFA-fixed cells (Fig. 6D panel a). In contrast, a  
260 statistically significant difference was measured between CK1.2 and CK1.2 $\Delta$ N7. This result is  
261 consistent with the data obtained from the Western blot analyses (Fig. 6C) and suggest that the C-  
262 terminal deletions do not decrease the level of the kinase in the parasite. Next, the same experiment  
263 was performed using detergent-treated parasites to evaluate the ability of the mutant proteins to  
264 associate with the cytoskeleton or to localise to organelles (Fig. 6D panel b). There was no significant  
265 difference in fluorescence intensity between CK1.2 and CK1.2 $\Delta$ C10, suggesting that the last 10 amino  
266 acids are not required for the specific localisation of CK1.2. Conversely, a significant difference in  
267 fluorescence intensity was measured between CK1.2 and CK1.2 $\Delta$ N7, which was expected, and

268 between CK1.2 and CK1.2 $\Delta$ C43, indicating that the level of the two mutant proteins detected in the  
269 cells after detergent treatment was lower than that of the WT. The total level of CK1.2 $\Delta$ C43 did not  
270 change (Fig. 6C and 6D panel a), only the fraction associated with specific organelles or the  
271 cytoskeleton was reduced, suggesting that the decrease in intensity is the consequence of a lack of  
272 proper localisation of this mutant protein. In summary, our results suggest that the last 10 aa at the C-  
273 terminus are not implicated in the subcellular localisation of CK1.2, in contrast to the domain between  
274 aa 310 and 343, which corresponds to the low complexity regions absent in CK1.1. Deleting this  
275 domain prevents CK1.2 from associating with organelles and the cytoskeleton, thus it remains in the  
276 cytoplasm.

## 277 **Discussion**

278 Although, CK1.2 is essential for promastigotes, axenic and intra-macrophagic amastigotes, little is  
279 known about the essential functions it performs in the parasite and in the host cell [13]. The data  
280 presented here show that CK1.2 displays a pleiotropic localisation, consistent with its involvement in  
281 multiple processes. This finding is similar to the data obtained with its orthologs [1]. As shown in  
282 higher eukaryotes, localisation of CK1 is linked to its functions and regulates its specificity towards its  
283 substrates. Thus, the localisation of *Leishmania* CK1.2 provides insights into its functions [26],  
284 especially since the localisation or functions of CK1.2 orthologs in other parasites is largely unknown.  
285 In *Plasmodium falciparum*, the localisation of PfCK1 depends on the life cycle and is mainly at the  
286 surface of the red blood cells in early stages of infection and restricted to the parasite in mature  
287 trophozoites and merozoites [12]. In *Toxoplasma gondii*, the localisation is cytoplasmic [49]. Because  
288 *Leishmania* CK1.2 has 73% identity to TbCK1.2, 85% to TcCK1.2, 69% to TgCK1a and 62 % to  
289 PfCK1 [13], our data are transferable to other parasites.

290

## 291 **Localisation of CK1.2 and its possible functions**

292 Based on the localisation of CK1.2 and compared to the localisation and functions of its orthologs,  
293 several hypotheses could be made on its potential functions. *Leishmania* CK1.2 was detected in  
294 punctate structures in the cytoplasm of promastigotes as well as amastigotes. This localisation is

295 characteristic of the CK1 family [27]. Although, the origins of these structures are unknown in  
296 *Leishmania*, human CK1 $\delta$  and HRR25, its *Saccharomyces cerevisiae* ortholog are known to localise to  
297 P-bodies, which protect the kinase from degradation, especially during stress [11, 50]. P-bodies also  
298 store repressed mRNAs that mainly encode for regulatory processes [50]. Trypanosomatids contain P-  
299 bodies as well as other granules such as stress and heat shock granules [51] [52] [53], suggesting that  
300 such a localisation is conceivable for *Leishmania* CK1.2. Indeed, *Trypanosoma brucei* CK1.2 was  
301 recently shown to regulate ZC3H11, a protein involved in the stabilisation of stress response mRNAs  
302 [54]. This protein is mainly localised in the cytoplasm [55], which is consistent with the localisation of  
303 CK1.2 and might suggest a role in mRNA stabilisation for the *Leishmania* kinase.

304 CK1.2 is localised to the basal body, similarly to human CK1 $\epsilon$ , which was shown to be involved in  
305 primary cilia disassembly [56], and to the axoneme, consistent with proteomic data that identified  
306 CK1.2 among the flagellar proteins in *T. brucei* and *Leishmania mexicana* [57] [58]. With  
307 *Chlamydomonas reinhardtii* and *Trypanosoma brucei*, *Leishmania* is the only eukaryote showing a  
308 flagellar localisation of CK1 [59]. These findings suggest that CK1.2 could be involved in motility  
309 [59].

310 The localisation of CK1.2 at the flagellar pocket suggests that the kinase might be exported by and/or  
311 regulate endocytosis. There are evidences supporting the two hypotheses: (i) CK1.2 is exported by  
312 exosomes, probably through the FP [22] [32]; and (ii) Hrr25, as well as human CK1 $\delta/\epsilon$  promotes  
313 initiation of clathrin-mediated endocytosis through its recruitment to endocytic sites [10]. We showed  
314 for the first time that Hsp90 is located at the flagellar pocket and more specifically to the neck, where  
315 it co-localises with CK1.2. Because CK1.2 phosphorylates Hsp90, both proteins may be involved in  
316 functions associated with the FPN such as facilitating the entry of macromolecules or regulating  
317 endocytosis [35, 36, 60]. However, given the localisation of these two proteins, an involvement in the  
318 regulation of FAZ proteins cannot be excluded and will be further investigated. In human cells, the  
319 phosphorylation of Hsp90 by human CK1 was shown to regulate the balance between protein folding  
320 and degradation [34]. CK1.2 also shares a cell-wide distribution with Hsp70, suggesting that both  
321 proteins might interact. Here, we demonstrated that Hsp70 is a substrate of CK1.2, which is consistent  
322 with the phosphorylation of human Hsp70 by human CK1 [34]. The results from the kinase assay and

323 the co-localisation studies suggest that Hsp70 might be involved in the regulation of CK1.2  
324 localisation. The roles of these complexes are unknown but should be explored further as Hsp70,  
325 Hsp90 and CK1.2 are exported via exosomes [22].

326  
327 CK1.2 was detected in the nucleus and more specifically in the nucleolus where it seems to have a  
328 dual function. It might be involved in the regulation of the last steps of ribosomal processing rather  
329 than in rDNA transcription. This is different from previous data related to yeast and human CK1s,  
330 implicating them in the maturation of pre-40S ribosomes in the cytoplasm [61] [62]. Nevertheless,  
331 human CK1 $\alpha$  and  $\delta$  have been identified in the proteome of the nucleolus, suggesting that, similarly to  
332 *Leishmania* CK1.2, they might play a role in this organelle [63]. The second function of nucleolar  
333 CK1.2 might be linked to chromosome segregation. Indeed, we showed that nucleolar CK1.2 co-  
334 localises with tubulin from the assembly of the mitotic spindle to its elongation. This is consistent with  
335 the nucleolus as a site of mitotic spindle elongation and thus of chromosome segregation [41] [64].  
336 Our data suggest that the nucleolar pool of CK1.2 might be redistributed onto the mitotic spindle  
337 during mitosis, and by analogy to human CK1 $\alpha$  might be involved in spindle positioning [65]. The  
338 redistribution of nucleolar proteins has been described for other kinetoplastid proteins such as  
339 TbNOP86, a protein potentially involved in chromosome segregation in *T. brucei* [43] and LdTWF, an  
340 actin-binding protein that controls mitotic spindle elongation in *Leishmania* [41]. The knockdown of  
341 TbCK1.2 in bloodstream form parasites generates multinucleated cells [66]. These findings are  
342 consistent with a role of *Leishmania* CK1.2 in kinetoplast and chromosome segregation.

343

### 344 **Regulation of CK1.2 localisation**

345 The subcellular localisation of mammalian CK1 depends on interacting partners such as FAM83  
346 proteins [1, 27], suggesting that the N- and C-terminal domains, which are involved in protein-protein  
347 interactions, are crucial for the regulation of CK1 localisation. However, nothing was known about the  
348 motifs important to drive these interactions. Here, we showed that the C-terminal domain of CK1.2,  
349 between the amino acids 310 and 343, contains two Low Complexity Regions (LCRs), which are

350 essential for its localisation. Indeed, LCRs were shown to be more abundant in highly connected  
351 proteins, such as signalling kinases [67], and may contribute to the binding of interacting partners.  
352 Removing these domains reduced the ability of CK1.2 to localise to specific organelles and subcellular  
353 structures. These LCRs are absent from the C-terminus of *Leishmania* CK1.1; instead one LCR is  
354 found at the N-terminus [68]. Based on the hypothesis that the LCRs drive the specificity of protein  
355 interactions, the localisation of CK1.1 should be different from that of CK1.2. Indeed, CK1.1 is a low  
356 abundant protein that was not detected in the flagellum, the basal bodies, the nucleolus, or the mitotic  
357 spindle [45]. Moreover, CK1.1, unlike CK1.2, was not identified as an exosomal cargo. The presence  
358 of LCRs in the C-terminus, which is the main difference between the two proteins, could thus be  
359 essential for the export of CK1.2 and its potential functions in the host cell [22, 24] [69].  
360 Consequently, the identification of CK1.2 binding partners will be critical to understand how CK1.2  
361 localisation is regulated. These LCRs are also found in the C-terminal domain of CK1 $\alpha$ , CK1 $\delta$  and  
362 CK1 $\epsilon$ , as well as in the C- and N-terminus of CK1 $\gamma$ 1, CK1 $\gamma$ 2, CK1 $\gamma$ 3, suggesting that they might share  
363 similar characteristics to that of *Leishmania* CK1.2 and thus be crucial for their localisations (Fig. S5,  
364 [http://smart.embl-heidelberg.de/smart/set\\_mode.cgi?NORMAL=1](http://smart.embl-heidelberg.de/smart/set_mode.cgi?NORMAL=1), [70]). Recently, Fulcher et al.  
365 identified the FAM83A-H protein family, which act as subcellular anchors for CK1 isoforms through  
366 the conserved N-terminal domain of unknown function 1669 (DUF1669). FAM83 proteins could be  
367 part of an important mechanism for targeting CK1 activity to specific subcellular locations and  
368 substrates [27]. There are no orthologs in *Leishmania* as judged by protein alignment but similar  
369 mechanisms seems nevertheless to exist.

370 Likewise, the N-terminus is important for CK1.2, although its role remains elusive. Even though the  
371 removal of the N-terminus renders the protein undetectable in the cell, a degradation of CK1.2 by the  
372 proteasome, the lysosome or by autophagy was excluded. We hypothesise that the protein is directly  
373 excreted into the extracellular space [48]. This hypothesis is supported by the fact that *Leishmania*  
374 CK1.2, CK1.4 and *Plasmodium* CK1 were shown to be shedded into the extracellular medium [23, 71]  
375 [12]. Interestingly, the seven N-terminal amino acids are naturally absent in CK1.1, consistent with  
376 this protein being hardly detectable by Western blot or microscopy [45]. Remarkably, in contrast to

377 several CK1 orthologs in eukaryotes, the N- and C-termini are not required for kinase activity. Indeed  
378 CK1 was shown to be inhibited by auto-phosphorylation, thus truncation of its C-terminus increases  
379 kinase activity [1]. We do not observe this phenomenon with L-CK1.2, suggesting that the kinase  
380 might not be auto-inhibited by auto-phosphorylation, similarly to mammalian CK1s.

381

382 In conclusion, we provide the first insight into the localisation and the potential associated functions of  
383 CK1.2. The identification of the interacting proteins that drive the localisation of CK1.2 to these  
384 different organelles will be instrumental for the precise characterisations of its functions in *Leishmania*  
385 as well as in other parasites. Moreover, our present and previous data demonstrate the similarity of  
386 localisation, structure, activity, regulation between *Leishmania* CK1.2 and human CK1s, highlighting  
387 that *Leishmania* CK1.2 is an excellent model to study mammalian CK1s (these data, [72] [13] [73]).  
388 Indeed, we uncovered novel localisations of CK1 family members including the nucleolus and our  
389 data provide the first analysis of CK1 regulatory domains in parasites and the first demonstration of  
390 the importance of LCRs for CK1 localisation in eukaryotes. Finally, to date CK1.2 is the only  
391 *Leishmania* signalling kinase shown to be exported into the host cell via exosomes and to have the  
392 ability to regulate multiple host cell processes, suggesting that it could be a key player for host-  
393 pathogen interactions.

394

## 395 **Materials and Methods**

### 396 ***Leishmania* cell lines**

397 All the parasite cell lines used in this study were derived from *L. donovani* axenic 1S2D  
398 (MHOM/SD/62/1S-CL2D) clone LdBob, obtained from Steve Beverley, Washington University  
399 School of Medicine, St. Louis, MO. Promastigotes were cultured and differentiated into axenic  
400 amastigotes as described previously [45]. Parasites cell lines were grown in media with 30 µg/mL  
401 hygromycin B (ThermoFisher Scientific Cat# 10687010) to maintain the pLEXSY-CK1.2-V5 or the  
402 empty pLEXSY plasmids. The transgenic *L. donovani* cell lines containing either the pLEXSY or

403 pLEXSY-CK1.2-V5-HIS<sub>6</sub> (pLEXSY-CK1.2-V5) vectors, corresponding to the mock or expressing  
404 *Leishmania major* CK1.2 tagged with V5 and HIS<sub>6</sub>, respectively, were described previously [13].

## 405 **Plasmids**

406 For the generation of CK1.2ΔC10-V5-His<sub>6</sub>-, CK1.2ΔC43-V5-His<sub>6</sub>- and CK1.2ΔN7-V5-His<sub>6</sub>-  
407 expressing cell lines, we first amplified the V5-His<sub>6</sub> fragment from pBAD-thio-topo-CK1.2 [13] using  
408 the following primers: 5'-gatggcattctagaatcgatgatatccccggggtaagcctatcc-3' and 5'-  
409 gcatggatcgcgccgctcaatggtg-3'. Then we digested the PCR fragment with XbaI and NotI and cloned it  
410 into the pLEXSY-Hyg plasmid (Jena bioscience) digested with the same enzymes to obtain pLEXSY-  
411 V5-His<sub>6</sub> plasmid. Next, we amplified CK1.2ΔC10, CK1.2ΔC43 and CK1.2ΔN7 from pLEXSY-CK1.2  
412 [13] with the following primers for CK1.2ΔC10: 5'-gatggcatcggatccatgaacgttgagctgcgtgt-3' and 5'-  
413 gcatggatctctagagtttgcgctgttcggagc-3'; for CK1.2ΔC43: 5'-gatggcatcggatccatgaacgttgagctgcgtgt-3' and  
414 5'-gcatggatctctagagctttgctgttctgcag-3'; for CK1.2ΔN7: 5'-gatggcatcggatccatggtaatcgctatcgtattgg-3',  
415 5'-gcatggatctctagattgttccggtgcgccg-3'. We digested the PCR fragments with BglII and XbaI and  
416 cloned them into the pLEXSY-V5-His<sub>6</sub> digested with the same enzymes to obtain respectively  
417 pLEXSY-CK1.2ΔC10-V5-His<sub>6</sub>, pLEXSY-CK1.2ΔC43-V5-His<sub>6</sub> and pLEXSY-CK1.2ΔN7-V5-His<sub>6</sub>.  
418 Finally, these vectors were transfected in LdBob. We generated *E.coli* strains containing pBAD-thio-  
419 topo-LmaCK1.2ΔC10-V5-His<sub>6</sub>, pBAD-thio-topo-LmaCK1.2ΔC43-V5-His<sub>6</sub> or pBAD-thio-topo-  
420 LmaCK1.2ΔN7-V5-His<sub>6</sub> by amplifying the whole pBAD-thio-topo-LmaCK1.2-V5-His<sub>6</sub> except the  
421 last 30 bp, the last 129 bp or the first 18bp, respectively, using the following primers for CK1.2ΔC10:  
422 His<sub>6</sub> 5'-AAGGGCGAGCTTGAAGGTAAG-3' and 5'-GTTTGCCTGTTCCGGAGCG-3'; for  
423 CK1.2ΔC43: 5'-AAGGGCGAGCTTGAAGGTAAG-3' and 5'-GAAGCTTTGCTGTTCTCTGC-3'; and  
424 for CK1.2ΔN7: 5'-GGTAATCGCTATCGTATTGGTC-3' and 5'-CATAAGGGCGAGCTTGTCATC-3'.  
425 The linear PCR products were circularised by ligation with T4 DNA ligase (Promega Cat#M180A)  
426 (O/N, 4°C). Finally the plasmids pBADthio-LmaCK1.2ΔC10-V5-His<sub>6</sub>, pBADthio-LmaCK1.2ΔC43-  
427 V5-His<sub>6</sub> and pBADthio-LmaCK1.2ΔN7-V5-His<sub>6</sub> were sequenced and transformed in *Escherichia coli*  
428 Rosetta (DE3) pLysS Competent Cells (Merck Cat# 70956) for bacterial expression.



## 429 **Immunofluorescence**

430 Logarithmic phase promastigotes or axenic amastigotes (48h after shift at 37°C and pH5.5) were  
431 resuspended at  $2 \times 10^6$  parasites per mL in Dulbecco's Phosphate Buffer Saline (DPBS) (Gibco) and  
432 500  $\mu$ L were added to poly-L-lysine-coated coverslips placed in a 24-well plate. Plates were  
433 centrifuged 10 min at 1200 g at room temperature to settle parasites onto the coverslips. For fixation  
434 alone, cells were washed three times with DPBS and fixed in 4% paraformaldehyde (PFA) in DPBS  
435 for 15 min at room temperature. For cytoskeleton preparation, the protocol was adapted from [74].  
436 Briefly, cells were washed three times with DPBS, treated with 0.125% Nonidet 40 (Fluka  
437 BioChemika Cat# 74385) in PIPES buffer (100 mM piperazine-N,N-bis(2-ethanesulfonic acid)  
438 (PIPES) pH6.8, 1 mM  $MgCl_2$ ) for 2 minutes at room temperature and washed twice for 5 minutes in  
439 PIPES buffer. Cells were fixed in 4% PFA in DPBS for 15 min at room temperature. After PFA  
440 fixation, cells were washed three times in DPBS, neutralised 10 min with  $NH_4Cl$  (50 mM in DPBS),  
441 and washed again three times in DPBS. For the immuno-labelling of PFA-fixed cells or cytoskeleton  
442 preparations, the samples were blocked with 10% filtered heat-inactivated fetal calf serum (FCS)  
443 containing  $0.5 \text{ mg.mL}^{-1}$  saponin in DPBS for 30 min at room temperature and then washed for 5 min  
444 in DPBS. The cells were then incubated with primary antibodies diluted in DPBS with 0.5% Bovine  
445 Serum Albumin (BSA) and  $0.5 \text{ mg.mL}^{-1}$  saponin for 1h at room temperature. Three washes of 10 min  
446 were performed and the secondary antibody diluted in DPBS with 0.5% BSA and  $0.5 \text{ mg.mL}^{-1}$  saponin  
447 was added. After one hour incubation at room temperature in the dark, cells were washed twice for 10  
448 min in DPBS with 0.5% BSA and  $0.5 \text{ mg.mL}^{-1}$  saponin, and then twice in DPBS. Parasites were  
449 incubated with  $5 \text{ }\mu\text{g.mL}^{-1}$  Hoechst 33342 in DPBS for 8 min in the dark, washed twice with DPBS,  
450 one time with distilled water, air-dried, then mounted with slides using SlowFade Gold Antifade  
451 Mountant (ThermoFisher Scientific Cat# S36937). For methanol fixation, logarithmic phase  
452 promastigotes were washed twice in DPBS and resuspended at  $2 \times 10^7$  parasites per mL.  $10^6$  parasites  
453 were spread onto poly-L-lysine coated slides, and allowed to settle for 30 min in a humid chamber.  
454 Parasites were then fixed in methanol at  $-20^\circ\text{C}$  for 3 minutes and rehydrated for 10 min in DPBS at  
455 room temperature. For immuno-labelling of methanol-fixed parasites, samples were blocked with 10%  
456 filtered heat-inactivated FCS in DPBS for 15 min at room temperature and washed for 5 min in DPBS.

457 Then the cells were treated similarly as those fixed by PFA. The antibodies used were: mouse IgG2a  
458 anti-V5 tag monoclonal antibody (Thermo Fisher Scientific Cat# R960-25, RRID:AB\_2556564)  
459 diluted at 1/200 (in PFA and methanol fixed parasites) or at 1/300 (in cytoskeleton preparations);  
460 rabbit anti-V5 tag polyclonal antibody (Abcam Cat# ab9116, RRID:AB\_307024) diluted at 1/400;  
461 rabbit anti-LdCentrin polyclonal antibody (kind gift from Hira L. Nakhasi) diluted at 1/2000 [75];  
462 mouse IgG1 anti-IFT172 monoclonal antibody diluted at 1/200 [76]; mouse anti-PFR2 L8C4 clone  
463 antibody diluted at 1/10 [77]; mouse L1C6 anti-TbNucleolus monoclonal antibody diluted at 1/100  
464 (kind gift from Keith Gull [78]); mouse IgG1 anti- $\alpha$ -tubulin monoclonal DM1A antibody (Sigma-  
465 Aldrich Cat# T9026, RRID:AB\_477593) diluted at 1/400; chicken anti-Hsp70 and chicken anti-Hsp90  
466 antibodies diluted at 1/200 [79]. IgG subclass-specific secondary antibodies coupled to different  
467 fluorochromes were used for double labelling: anti-mouse IgG (H+L) coupled to AlexaFluor488  
468 (1/200 (PFA- or methanol-fixed parasites)) or 1/300 (cytoskeleton preparations), Thermo Fisher  
469 Scientific Cat# A-21202, RRID:AB\_141607)); anti-mouse IgG2a coupled to Cy3 (1/600; Jackson  
470 ImmunoResearch Labs Cat# 115-165-206, RRID:AB\_2338695); anti-mouse IgG1 coupled to  
471 AlexaFluor647 (1/600; Thermo Fisher Scientific Cat# A-21240, RRID:AB\_2535809); anti-rabbit IgG  
472 (H+L) coupled to AlexaFluor488 (1/400; Thermo Fisher Scientific Cat# A-21206,  
473 RRID:AB\_2535792); anti-mouse IgG (H+L) coupled to AlexaFluor594 (1/200; Thermo Fisher  
474 Scientific Cat# A-21203, RRID:AB\_2535789); anti-mouse IgG2a coupled to AlexaFluor488 (1/300;  
475 Thermo Fisher Scientific Cat# A-21131, RRID:AB\_2535771); anti-mouse IgG1 coupled to  
476 AlexaFluor594 (1/300; Thermo Fisher Scientific Cat# A-21125, RRID:AB\_2535767); anti-chicken  
477 IgY coupled to AlexaFluor594 (1/200; Jackson ImmunoResearch Labs Cat# 703-586-155,  
478 RRID:AB\_2340378) and anti-rabbit IgG (H+L) coupled to AlexaFluor594 (1/400; Thermo Fisher  
479 Scientific Cat# A-21207, RRID:AB\_141637).

## 480 **Confocal microscopy**

481 Images were visualised using a Leica SP5 HyD resonant scanner Matrix screener inverted microscope  
482 equipped with a HCX PL APO CS 63x, 1.4 NA oil objective (Leica, Wetzlar, Germany). Triple or  
483 quadruple immunofluorescence was imaged with Leica Application Suite AF software (LAS AF;

484 Leica Application Suite X, RRID:SCR\_013673) after excitation of the Hoechst 33342 dye with a  
485 diode at a wavelength of 405 nm (452/75 Emission Filter), excitation of the AlexaFluor488 with an  
486 argon laser at a wavelength of 488 nm (525/50 Emission Filter), excitation of AlexaFluor594 with a  
487 diode DPSS at a wavelength of 561 nm (634/77 Emission Filter), excitation of Cy3 with a diode DPSS  
488 at a wavelength of 561 nm (595/49 Emission Filter), and excitation of AlexaFluor647 with a helium-  
489 neon laser at a wavelength of 633 nm (706/107 Emission Filter). Images were scanned sequentially to  
490 minimise cross excitation between channels and each line was scanned twice and averaged to increase  
491 the signal-to-noise ratio. The pinhole aperture was set to 1 airy. Images were acquired with 8x zoom at  
492 a resolution of 1024×1024. Z-stacks were acquired at 0.082  $\mu\text{m}$  intervals, deconvolved and rendered  
493 using either Fiji (RRID:SCR\_002285) or Icy (RRID:SCR\_010587) software [80]  
494 (<http://icy.bioimageanalysis.org/>).

#### 495 **Deconvolution of z-stacks and chromatic aberration correction**

496 All confocal images were processed and analysed by using the Huygens Professional software version  
497 19.04 (Scientific Volume Imaging, Huygens Software, RRID:SCR\_014237). Deconvolution of  
498 confocal z-stacks was optimised using the following settings: automatic estimation of the average  
499 background with the mode “Lowest” and area radius = 0.7, deconvolution algorithm CMLE,  
500 maximum number of iterations = 40, signal to noise ratio (SNR) = 20, quality change threshold = 0.05,  
501 iteration mode = optimised, brick layout = automatic. Theoretical point spread function (PSF) values  
502 were estimated for each z-stack. All deconvolved images were corrected for chromatic shifts and for  
503 rotational differences between different channels using the Chromatic Aberration Corrector (CAC)  
504 from Huygens Professional software (Scientific Volume Imaging, Huygens Software,  
505 RRID:SCR\_014237). To calibrate the image corrections, multifluorescent 0.2  $\mu\text{m}$  TetraSpeck  
506 microspheres (ThermoFisher Scientific Cat#T7280) mounted on SlowFade Gold Antifade mountant  
507 (ThermoFisher Scientific Cat# S36937) were imaged with identical acquisition parameters. Images  
508 were deconvolved similarly, and were used to perform the chromatic aberration estimations with the  
509 cross correlation method in CAC software. Corrections were saved as templates and applied for  
510 correction of the similarly acquired and deconvolved images in CAC.

## 511 **Co-localisation analysis of confocal images**

512 Co-localisation analysis was performed with the Co-localisation Analyzer plug-in of the Huygens  
513 Professional software (Scientific Volume Imaging, Huygens Software, RRID:SCR\_014237, v19.04).  
514 Processed cross-section images (deconvolved and corrected for chromatic aberrations) of the parasites  
515 were opened with this plug-in and Pearson coefficients were calculated for each parasite. Specific  
516 areas of the parasite were cropped from the whole image (basal body area, flagella pocket area, mitotic  
517 spindle and reduced mitotic spindle areas, flagellar pocket neck area and flagellar tip area) and  
518 Pearson coefficients were calculated for these images. Pearson coefficients of the co-localisation in the  
519 basal body and flagellar pocket areas of (i) CK1.2-V5 with Centrin (CEN), IFT172, and DNA  
520 (Hoechst 33342, H); or (i) CEN with IFT172, from 14 images were plotted in scattered dot plots with  
521 the mean and standard deviation using GraphPad Prism 8.1.1 (GraphPad Software, GraphPad Prism,  
522 RRID:SCR\_002798). Pearson coefficients of the co-localisation of CK1.2-V5 with tubulin in the  
523 mitotic spindle and reduced mitotic spindle areas from seven images were plotted similarly. Pearson  
524 coefficients of the co-localisation of CK1.2-V5 with Hsp90 from seven images and with Hsp70 from  
525 ten images were also plotted similarly.

## 526 **Epifluorescence microscopy and automated parasite detection**

527 Images were visualised using a Zeiss upright widefield microscope equipped with Apotome2 grids and  
528 a Pln-Apo 63x, 1.4 NA oil objective (Zeiss). Light source used was a Mercury Lamp HXP 120, and  
529 following filters were used: DAPI (Excitation G365; dichroic FT 395; emission BP 420-470), FITC-  
530 A488-GFP (Excitation BP 455-495; dichroic FT 500; emission BP 505-555) and A594-TexasRed-  
531 mCherry-HcRed-mRFP (Excitation BP 542-582; dichroic FT 593; emission BP 604-644). Images  
532 were captured on an AxioCam MRm camera using ZEN Blue software. For comparison of different  
533 cell lines, identical parameters of acquisition were applied on all samples.

534 For the analysis of the fluorescence intensity in the parasite body of different cell lines (mock, WT and  
535 domain-deleted mutants), we used the graphical programming plugin Protocols in Icy software (Icy,  
536 RRID:SCR\_010587 [81]). A screenshot of the protocol that was applied on the epifluorescence images  
537 is shown in Figure S6. Briefly, maximum intensity projection in Z was generated in all channels.

538 Nuclei were segmented with HK-Means plugin (in the nucleus specific channel [82]), and the regions  
539 of interest (ROI) generated were used as input for automatically segment the boundary of the parasite  
540 body stained with V5 antibody (in all the cell lines) with Active Contours plugin [83]. The recovered  
541 ROIs were verified and corrected manually if needed. Properties of the ROI (e.g. sum fluorescence  
542 intensity, roundness, and interior) were obtained and used for analysis. Dot plots were generated with  
543 GraphPad Prism 8.1.1 (GraphPad Software, GraphPad Prism, RRID:SCR\_002798).

#### 544 **Protein extraction, SDS-PAGE and Western blot analysis**

545 Logarithmic phase promastigotes were washed in DPBS and protein extraction was performed as  
546 described previously [45]. Ten micrograms of total protein were separated by SDS-PAGE, and  
547 transferred onto polyvinylidene difluoride (PVDF) membranes (Pierce). Membranes were blocked  
548 with 5% BSA in DPBS supplemented with 0.25% Tween20 (PBST) and incubated over night at 4°C  
549 with primary antibody mouse IgG2a anti-V5 tag monoclonal antibody (1/1000; Thermo Fisher  
550 Scientific Cat# R960-25, RRID:AB\_2556564) in 2,5% BSA in PBST. Membranes were then washed  
551 in PBST and incubated with secondary antibody anti-mouse IgG (H+L) coupled to horseradish  
552 peroxidase (1/20000; ThermoFisher Scientific Cat# 32230, RRID:AB\_1965958). Proteins were  
553 revealed by SuperSignal™ West Pico Chemiluminescent Substrate (ThermoFisher Scientific Cat#  
554 34580) using the PXi image analysis system (Syngene) at various exposure times. Membranes were  
555 then stained with Bio-Safe Coomassie (Bio-Rad Cat #1610786) to serve as loading controls.

#### 556 **Proteasome and lysosome inhibition assays**

557 Logarithmic phase promastigotes expressing CK1.2-V5-His<sub>6</sub>, CK1.2ΔC10-V5-His<sub>6</sub>, CK1.2ΔC43-V5-  
558 His<sub>6</sub>, CK1.2ΔN7-V5-His<sub>6</sub> or mock control (pLEXSY empty plasmid) were resuspended into fresh  
559 M199-supplemented promastigote medium at 5×10<sup>6</sup> parasites per mL with or without either 10 μM  
560 MG132 (Sigma-Aldrich Cat# M7449) or 20 mM NH<sub>4</sub>Cl (VWR Chemicals Cat# 21235.297). Drug  
561 selection was maintained with 30 μg hygromycin B (Invitrogen). Parasites were grown for 24h at  
562 26°C and were then lysed for protein extraction as described before. Western blot analysis of ten  
563 micrograms of total protein was performed as described before.

564 Ten micrograms of total proteins treated with or without MG132 were also subjected to Western blot  
565 analysis to detect ubiquitinated proteins. Membrane was blocked with 5% BSA in DPBS  
566 supplemented with 0.25% Tween20 (PBST) and incubated over night at 4°C with primary mouse  
567 mono- and polyubiquitinated conjugates FK2 monoclonal antibody (1/500; Enzo Life Sciences Cat#  
568 BML-PW8810, RRID:AB\_10541840) in 2,5% BSA in PBST. Following washing in PBST, the  
569 membrane was incubated with secondary antibody anti-mouse IgG (H+L) coupled to horseradish  
570 peroxidase (1/20000; ThermoFisher Scientific Cat# 32230, RRID:AB\_1965958). The immunoblot  
571 was revealed with SuperSignal™ West Pico PLUS Chemiluminescent Substrate (ThermoFisher  
572 Scientific Cat# 34580) using the PXi image analysis system (Syngene) with 5 min exposure time. The  
573 membrane was then stained with Bio-Safe Coomassie G-250 stain (Bio-Rad Cat #1610786) to serve as  
574 loading control.

575 To validate lysosomal inhibition by NH<sub>4</sub>Cl treatment, parasites were sampled prior cell lysis and  
576 stained to access lysosomal pH. Treated or untreated parasites were incubated with 100 mM  
577 LysoTracker™ Red DND-99 (ThermoFisher Scientific Cat# L7528) in culture medium for 30 min at  
578 26°C and analysed with a CytoFLEX flow cytometer (Beckman Coulter, Inc.) to test for acidic pH of  
579 lysosomes upon treatment (exλ = 577 nm; emλ = 590 nm). LysoTracker fluorescence intensity was  
580 measured for 15000 parasites using CytExpert software (CytExpert Software, RRID:SCR\_017217,  
581 Beckman Coulter, v2.2.0.97). Graphs representing mean LysoTracker fluorescence intensity were  
582 generated with GraphPad Prism 8.1.1 (GraphPad Software, GraphPad Prism, RRID:SCR\_002798).

### 583 **Recombinant expression, purification of CK1.2-V5-His<sub>6</sub>, CK1.2ΔC10-V5-His<sub>6</sub>,** 584 **CK1.2ΔC43-V5-His<sub>6</sub> and CK1.2ΔN7-V5-His<sub>6</sub> and protein kinase assay**

585 *Escherichia coli* Rosetta (DE3) pLysS Competent Cells (Merck Cat# 70956) containing pBAD-thio-  
586 topo-LmaCK1.2-V5-His<sub>6</sub>, pBAD-thio-topo-LmaCK1.2ΔC10-V5-His<sub>6</sub>, pBAD-thio-topo-  
587 LmaCK1.2ΔC43-V5-His<sub>6</sub> or pBAD-thio-topo-LmaCK1.2ΔN7-V5-His<sub>6</sub> were grown at 37°C and  
588 induced with arabinose (0,02% final) for 4h at room temperature [13]. Cells were harvested by  
589 centrifugation at 10,000 g for 10 min at 4°C and the recombinant proteins were purified as described

590 previously [13] [73]. The eluates were supplemented with 15% glycerol and stored at  $-80^{\circ}\text{C}$ . The  
 591 kinase assays were performed as described previously [13] [73].

## 592 QUANTIFICATION AND STATISTICAL ANALYSIS

593 Statistical analyses were performed with GraphPad Prism 8.1.1 (GraphPad Software, GraphPad Prism,  
 594 RRID:SCR\_002798) using unpaired t test (parametric test). Graphs were drawn using the same  
 595 software. All errors correspond to the 95% confidence interval. Statistically significant differences are  
 596 indicated with three ( $p < 0.01$ ), four ( $p < 0.001$ ) or five asterisks ( $p < 0.0001$ ). The number of samples  
 597 analysed for each experiment is indicated in figure legends.

## 598 RESOURCES TABLE

| REAGENT or RESOURCE                                                | SOURCE                               | IDENTIFIER                           |
|--------------------------------------------------------------------|--------------------------------------|--------------------------------------|
| Antibodies                                                         |                                      |                                      |
| Anti-V5 tag IgG2a mouse monoclonal                                 | Thermo Fisher Scientific             | Cat# R960-25,<br>RRID:AB_2556564     |
| Anti-Centrin from <i>L. donovani</i> rabbit polyclonal             | [75]                                 | N/A                                  |
| Anti-IFT172 from <i>T. brucei</i> IgG1 mouse monoclonal            | [76]                                 | N/A                                  |
| Anti-V5 tag IgG rabbit polyclonal                                  | Abcam                                | Cat# ab91116, RRID:AB_307024         |
| Anti-PFR2 from <i>T. brucei</i> mouse polyclonal (L8C4)            | [77]                                 | N/A                                  |
| Anti-nucleolus IgG from <i>T. brucei</i> mouse monoclonal (L1C6)   | Keith Gull, University of Oxford, UK | N/A                                  |
| Anti-alpha-tubulin IgG1 mouse monoclonal DM1A                      | Sigma-Aldrich                        | Cat# T9026, RRID:AB_477593           |
| Anti-Hsp90 from <i>L. donovani</i> IgY chicken polyclonal          | [79]                                 | N/A                                  |
| Anti-Hsp70 from <i>L. donovani</i> IgY chicken polyclonal          | [79]                                 | N/A                                  |
| Anti-mono- and polyubiquitinated conjugates mouse monoclonal (FK2) | Enzo Life Sciences                   | Cat# BML-PW8810,<br>RRID:AB_10541840 |
| Anti-mouse IgG (H+L) coupled to AlexaFluor488                      | Thermo Fisher Scientific             | Cat# A-21202,<br>RRID:AB_141607      |
| Anti-mouse IgG2a coupled to Cy3                                    | Jackson ImmunoResearch Labs          | Cat# 115-165-206,<br>RRID:AB_2338695 |

|                                                                                                                           |                                |                                      |
|---------------------------------------------------------------------------------------------------------------------------|--------------------------------|--------------------------------------|
| Anti-mouse IgG1 coupled to AlexaFluor647                                                                                  | Thermo Fisher Scientific       | Cat# A-21240,<br>RRID:AB_2535809     |
| Anti-rabbit IgG (H+L) coupled to AlexaFluor488                                                                            | Thermo Fisher Scientific       | Cat# A-21206,<br>RRID:AB_2535792     |
| Anti-mouse IgG (H+L) coupled to AlexaFluor594                                                                             | Thermo Fisher Scientific       | Cat# A-21203,<br>RRID:AB_2535789     |
| Anti-mouse IgG2a coupled to AlexaFluor488                                                                                 | Thermo Fisher Scientific       | Cat# A-21131,<br>RRID:AB_2535771     |
| Anti-mouse IgG1 coupled to AlexaFluor594                                                                                  | Thermo Fisher Scientific       | Cat# A-21125,<br>RRID:AB_2535767     |
| Anti-chicken IgY coupled to AlexaFluor594                                                                                 | Jackson<br>ImmunoResearch Labs | Cat# 703-586-155,<br>RRID:AB_2340378 |
| Anti-rabbit IgG (H+L) coupled to AlexaFluor594                                                                            | Thermo Fisher Scientific       | Cat# A-21207,<br>RRID:AB_141637      |
| Anti-mouse IgG (H+L) coupled to horseradish peroxidase                                                                    | Thermo Fisher Scientific       | Cat# 32230, RRID:AB_1965958          |
| <b>Bacterial Strains</b>                                                                                                  |                                |                                      |
| <i>Escherichia coli</i> Rosetta (DE3) pLysS Competent Cells                                                               | Merck                          | Cat# 70956                           |
| <b>Experimental Models: Organisms/Cell lines</b>                                                                          |                                |                                      |
| <i>Ld</i> Bob cells with pLEXSY vector (mock)                                                                             | [13]                           | N/A                                  |
| <i>Ld</i> Bob cells with pLEXSY-CK1.2-V5-His <sub>6</sub> vector, expressing <i>Lma</i> CK1.2-V5-His <sub>6</sub>         | [13]                           | N/A                                  |
| <i>Ld</i> Bob cells with pLEXSY-CK1.2ΔC10-V5-His <sub>6</sub> vector, expressing <i>Lma</i> CK1.2ΔC10-V5-His <sub>6</sub> | This study                     | N/A                                  |
| <i>Ld</i> Bob cells with pLEXSY-CK1.2ΔC43-V5-His <sub>6</sub> vector, expressing <i>Lma</i> CK1.2ΔC43-V5-His <sub>6</sub> | This study                     | N/A                                  |
| <i>Ld</i> Bob cells with pLEXSY-CK1.2ΔN7-V5-His <sub>6</sub> vector, expressing <i>Lma</i> CK1.2ΔN7-V5-His <sub>6</sub>   | This study                     | N/A                                  |
| <b>Chemicals, Peptides, and Recombinant Proteins</b>                                                                      |                                |                                      |
| Nonidet P40 (NP40)                                                                                                        | Fluka BioChemika               | Cat# 74385                           |
| Ammonium Chloride (NH <sub>4</sub> Cl)                                                                                    | VWR Chemicals                  | Cat# 21235.297                       |
| Carbobenzoxy-Leu-Leuleucinal (MG132)                                                                                      | Sigma-Aldrich                  | Cat# M7449                           |
| SlowFade Gold Anti-Fade                                                                                                   | ThermoFisher Scientific        | Cat# S36937                          |
| Recombinant thio- <i>Lma</i> CK1.2-V5-His <sub>6</sub>                                                                    | This study, (5)                | N/A                                  |
| Recombinant thio- <i>Lma</i> CK1.2ΔC10-V5-His <sub>6</sub>                                                                | This study                     | N/A                                  |



|                                                                                                                                                           |                 |                            |
|-----------------------------------------------------------------------------------------------------------------------------------------------------------|-----------------|----------------------------|
| Recombinant thio- <i>Lma</i> CK1.2ΔC43-V5-His <sub>6</sub>                                                                                                | This study      | N/A                        |
| Recombinant thio- <i>Lma</i> CK1.2ΔN7-V5-His <sub>6</sub>                                                                                                 | This study      | N/A                        |
| Recombinant MBP                                                                                                                                           | Sigma-Aldrich   | Cat# M1891                 |
| <b>Oligonucleotides</b>                                                                                                                                   |                 |                            |
| Primer: pBADthio- <i>Lma</i> CK1.2ΔC10-V5-His <sub>6</sub><br>and pBADthio- <i>Lma</i> CK1.2ΔC43-V5-His <sub>6</sub><br>forward:<br>AAGGGCGAGCTTGAAGGTAAG | This study      | N/A                        |
| Primer: pBADthio- <i>Lma</i> CK1.2ΔC10-V5-His <sub>6</sub><br>reverse:<br>GTTTGCCTGTTTCGGAGCG                                                             | This study      | N/A                        |
| Primer: pBADthio- <i>Lma</i> CK1.2ΔC43-V5-His <sub>6</sub><br>reverse:<br>GAAGCTTTGCTGTTCTCTGC                                                            | This study      | N/A                        |
| Primer: pBADthio- <i>Lma</i> CK1.2ΔN7-V5-His <sub>6</sub><br>forward:<br>GGTAATCGCTATCGTATTGGTC                                                           | This study      | N/A                        |
| Primer: pBADthio- <i>Lma</i> CK1.2ΔN7-V5-His <sub>6</sub><br>reverse:<br>CATAAGGGCGAGCTTGTCATC                                                            | This study      | N/A                        |
| <b>Recombinant DNA</b>                                                                                                                                    |                 |                            |
| Plasmid: pLEXY-hyg2 (HygR)                                                                                                                                | Jena Bioscience | Cat# EGE-232               |
| Plasmid: pLEXY-CK1.2-V5-His <sub>6</sub> (HygR)                                                                                                           | (5)             | N/A                        |
| Plasmid: pLEXY-CK1.2ΔC10-V5-His <sub>6</sub> (HygR)                                                                                                       | This study      | N/A                        |
| Plasmid: pLEXY-CK1.2ΔC43-V5-His <sub>6</sub> (HygR)                                                                                                       | This study      | N/A                        |
| Plasmid: pLEXY-CK1.2ΔN7-V5-His <sub>6</sub> (HygR)                                                                                                        | This study      | N/A                        |
| Plasmid: pBADthio- <i>Lma</i> CK1.2-V5-His <sub>6</sub>                                                                                                   | This study,     | N/A                        |
| Plasmid: pBADthio- <i>Lma</i> CK1.2ΔC10-V5-His <sub>6</sub>                                                                                               | This study      | N/A                        |
| Plasmid: pBADthio- <i>Lma</i> CK1.2ΔC43-V5-His <sub>6</sub>                                                                                               | This study      | N/A                        |
| Plasmid: pBADthio- <i>Lma</i> CK1.2ΔN7-V5-His <sub>6</sub>                                                                                                | This study      | N/A                        |
| <b>Software and Algorithms</b>                                                                                                                            |                 |                            |
| Icy                                                                                                                                                       | Icy             | RRID:SCR_010587            |
| GraphPad Prism                                                                                                                                            | GraphPad        | RRID:SCR_002798            |
| CytExpert Software                                                                                                                                        | Beckman Coulter | RRID:SCR_017217, v2.2.0.97 |

|                                     |                       |                           |
|-------------------------------------|-----------------------|---------------------------|
| Fiji                                | Fiji                  | RRID:SCR_002285           |
| Huygens Professional                | Scientific<br>Imaging | Volume<br>RRID:SCR_014237 |
| Leica Application Suite AF (LAS AF) | Leica                 | RRID:SCR_013673           |

599

## 600 **Acknowledgments**

601 This work was supported by the ANR-13-ISV3-0009. Daniel Martel was supported by the French  
602 Government's Investissements d'Avenir program Laboratoire d'Excellence Integrative Biology of  
603 Emerging Infectious Diseases (grant no. ANR-10-LABX-62-IBEID studentship). Part of the work was  
604 supported by the Deutsche Forschungsgemeinschaft Grant Cl 120/8-1. We thank Frauke Fuchs for  
605 technical assistance. The authors would like to thanks Hira L Nakhasi, U.S. FDA, for the anti-  
606 *Ldcentrin* antibody; Philippe Bastin, Institut Pasteur, for the anti-*TbIFT172* and anti-*TbPFR2* (L8C4)  
607 antibodies; Keith Gull, University of Oxford for the L1C6 antibody; the Unit of Technology and  
608 Service - Photonic BioImaging (UTechS PBI) from the Institut Pasteur, for the help with confocal  
609 microscopy and analyses of co-localisations, in particular Audrey Salles, Julien Fernandes and Anne  
610 Danckaert. Finally, we would like to thanks Brice Rotureau, Thierry Blisnick and Philippe Bastin for  
611 fruitful discussions and advices.

612

## 613 **Author contribution**

614 Conceptualization: DM, NR; Formal analysis: DM, JC, GFS, NR; Investigation: DM, SP, KB, NR;  
615 Funding acquisition: JC, GFS, NR; Supervision JC, GFS, NR; Writing –original draft: DM, NR;  
616 Writing –review & Editing: DM, SP, KB, JC, GFS, NR.

617 **Figure legends**

618 **FIGURE 1: *Leishmania* CK1.2 localisation is ubiquitous**

619 (A) IFA of *LdBob* pLEXSY-CK1.2-V5 and (B) *LdBob* pLEXSY (mock) promastigotes, fixed with  
620 PFA. The confocal images show the anti-V5 staining (CK1.2-V5 or V5, green), Hoechst 33342  
621 staining (H, blue), a merge and the transmission image (Trans). Scale bar, 2  $\mu$ m. The pictures are  
622 maximum intensity projection of the confocal stacks containing the parasites. (C) Analysis of different  
623 parameters extracted from ROI of the promastigotes parasite bodies. Scatter dot plots showing the sum  
624 of fluorescence intensity (for the V5 signal) of CK1.2-V5-expressing or mock control cell lines. The  
625 red line corresponds to the mean intensity. (D) IFA of *LdBob* pLEXSY-CK1.2-V5 promastigotes  
626 obtained after detergent treatment followed by PFA fixation. Similar to (A), except that the images are  
627 sum intensity projection of the confocal stacks containing the parasites.

628

629 **FIGURE 2: CK1.2 localises to the basal bodies and the flagellum.**

630 IFA of *LdBob* pLEXSY-CK1.2-V5 promastigotes obtained after detergent treatment followed by PFA  
631 fixation. (A) Single channel images of the CK1.2-V5, Hoechst 33342 (H), centrin 4 (CEN) or IFT172  
632 signals and the transmission image (Trans). The white arrow highlights the basal bodies and the  
633 yellow arrow the bilobe region. (B) The merge panel shows CK1.2-V5 signal (green) merged with H  
634 (Hoechst 33342, blue), CEN (centrin 4, red) and IFT172 (cyan). The two right panels show a  
635 magnification of region 1 with H signal (blue) merged with (a) CK1.2-V5 (green) and CEN (red) and  
636 (b) IFT172 (red) and CK1.2-V5 (green) signals. Scale bar, 2  $\mu$ m or 1  $\mu$ m for magnified images. These  
637 pictures are single stacks extracted from deconvolved confocal stacks corrected for chromatic  
638 aberration. The white arrows highlight the basal bodies and the yellow arrow the bilobe region. (C)  
639 Dot plots showing Pearson's covariation coefficients in the basal body (BB) or the flagellar pocket  
640 (FP) regions for different combination of signals. Pearson's covariation coefficients were measured  
641 from n=14 different confocal stacks which were deconvolved and corrected for chromatic aberration  
642 with Huygens Professional software. The plot was generated with GraphPad Prism software and the

643 mean values are represented with red bold segments. (D) IFA of *LdBob* pLEXSY-CK1.2-V5  
644 promastigotes fixed by PFA and stained with the anti-V5 and anti-IFT172 antibodies. The left panels  
645 display the single channel images of the CK1.2-V5, IFT172, Hoechst 33342 (H) signals, the  
646 transmission image (Trans), and a merge of CK1.2-V5 (green), IFT172 (red) and H (blue) signals. The  
647 right panel shows a 3D-reconstruction (3D view) of the flagellum (image 2), with CK1.2-V5 signal  
648 (green) merged with IFT172 (red). (E) IFA of *LdBob* pLEXSY-CK1.2-V5 promastigotes obtained  
649 after detergent treatment followed by PFA fixation and staining with the anti-V5 and anti-PFR2  
650 antibodies. The following images show CK1.2-V5, PFR2, Hoechst 33342 (H) signals, the transmission  
651 image (Trans), and finally the merge of CK1.2-V5 (green), PFR2 (red) and H (blue) signals. (image 3)  
652 3D-reconstruction (3D view) of the flagellum (white square in (merge)), showing CK1.2-V5 signal  
653 (green) merged with PFR2 (red). Scale bars, 2  $\mu\text{m}$  or 1  $\mu\text{m}$  for 2D images. Pictures in (E) and (D, left  
654 panels) are single stacks extracted from deconvolved confocal stacks corrected for chromatic  
655 aberration. All confocal stacks containing the parasite were used for pictures (D, image 2 and E image  
656 3).

657

658 **FIGURE 3: CK1.2 and Hsp90 co-localise to the flagellar pocket neck. Hsp70 co-localises with**  
659 **CK1.2 to the flagellum, to the flagellar tip and to the basal body.**

660 (A) IFA pictures of *LdBob* pLEXSY-CK1.2-V5 promastigotes obtained after detergent treatment  
661 followed by PFA fixation. (a and b) The left panel shows the transmission images merged with (a)  
662 Hoechst 33342 (H, blue) and CK1.2-V5 (green) signals, or (b) with H (blue) and Hsp90 (red) signals.  
663 The left panel in (c) shows a merged image of H (blue) with CK1.2-V5 (green) and Hsp90 (red)  
664 signals. The right panels show a magnification of the flagellar pocket and basal body region (white  
665 square) for their respective left panel. Scale bar, 2  $\mu\text{m}$ . These pictures are single stacks extracted from  
666 deconvolved confocal stacks corrected for chromatic aberration. (B) Dot plots showing Pearson's  
667 covariation coefficients for CK1.2-V5 and Hsp90 signals at the FPN or in the whole parasite region  
668 (WP). Pearson's covariation coefficients were measured from n=7 different confocal stacks, which  
669 were deconvolved and corrected for chromatic aberration with Huygens Professional software. The

670 plot was generated with GraphPad Prism software and the mean values are represented with red bold  
671 segments. (C) 3D-reconstruction of the anterior end of the parasite body from image (A) panel (c)  
672 (white rectangle region), showing CK1.2-V5 signal (green) merged with Hsp90 (red) and H (blue). All  
673 confocal stacks containing the parasite were used for this picture. (D) IFA pictures of *LdBob*  
674 pLEXSY-CK1.2-V5 promastigotes obtained after detergent treatment followed by PFA fixation.  
675 Single channel images show Hsp70, Hoechst 33342 (H, blue) and CK1.2-V5 (green) signals, and the  
676 transmission image (Trans). Region (1) shows a magnification of the flagellum (white square region)  
677 of the merged panel. The pictures are maximum intensity projection of the confocal stacks containing  
678 the parasites, after removal of the stacks in contact with the glass coverslip. Confocal stacks were  
679 deconvolved and corrected for chromatic aberration. Scale bar, 2  $\mu$ m. The white arrow highlights  
680 Hsp70 and CK1.2 signal to the flagellar tip. (E) Dot plots showing Pearson's covariation coefficients  
681 for CK1.2-V5 and Hsp70 signals in the flagellar tip, flagellar pocket, basal body regions or the whole  
682 parasite region. Pearson's covariation coefficients were measured from n=10 different confocal stacks  
683 which were deconvolved and corrected for chromatic aberration with Huygens Professional software.  
684 The plot was generated with GraphPad Prism software and the mean values are represented with red  
685 bold segments. (F) *In vitro* kinase assay Hsp70. HSP70 was incubated with or without rCK1.2 and  
686 with rCK1.2 + D4476 (CK1 inhibitor) in presence of buffer C and  $\gamma$ -<sup>32</sup>P-ATP. Kinase assays were  
687 performed at 30°C for 30 min and reaction samples were separated by SDS-PAGE, gels were stained  
688 by Coomassie (right panel), and signals were revealed by autoradiography (left panel). The position of  
689 marker proteins is indicated on the left, the positions of CK1.2 and HSP70 are indicated on the right.  
690 Results are representative of two independent experiments.

691

692 **FIGURE 4: CK1.2 localises in the nucleolus and to the mitotic spindle.**

693 (A) IFA pictures of *LdBob* pLEXSY-CK1.2-V5 promastigotes obtained after detergent treatment  
694 followed by PFA fixation. The images show the single channel images of the transmission image  
695 (Trans), CK1.2-V5, Hoechst 33342 (H, blue) and L1C6 signals (red) and merged image. The right  
696 panel show a magnification of the nucleus region. Scale bar, 2  $\mu$ m. These pictures are single stacks

697 extracted from deconvolved confocal stacks corrected for chromatic aberration. (B) IFA pictures of  
698 *LdBob* pLEXSY-CK1.2-V5 promastigotes obtained after detergent treatment followed by PFA  
699 fixation and stained with anti-V5 (CK1.2-V5) and anti-L1C6 (nucleolus, L1C6) antibodies. Confocal  
700 images representing sequential events of mitosis revealed different localisation patterns of L1C6  
701 nucleolar marker and CK1.2-V5. (a – f) The images show the merged image containing CK1.2-V5  
702 (green), Hoechst 33342 (H) (blue) and L1C6 (red) signals and a magnification of the nuclear region.  
703 N=nucleus, K=kinetoplast. Scale bar, 2  $\mu\text{m}$  or 1  $\mu\text{m}$  for magnified images. These pictures are single  
704 stacks extracted from deconvolved confocal stacks corrected for chromatic aberration. See also Figure  
705 S3A. (C) IFA pictures of *LdBob* pLEXSY-CK1.2-V5 promastigotes obtained after detergent treatment  
706 followed by PFA fixation and stained with anti-V5 and anti- $\alpha$ -tubulin antibodies. Sequential images of  
707 various stages of cell division (a – e) showing the single channel images for  $\alpha$ -tubulin signals and the  
708 merged images showing CK1.2-V5 (green), H (blue) and  $\alpha$ -tubulin (red) signals. Scale bar, 2  $\mu\text{m}$ .  
709 These pictures are single stacks extracted from deconvolved confocal stacks corrected for chromatic  
710 aberration. See also Figure S3B. (D) Dot plots showing Pearson's covariation coefficients for different  
711 combination of signals in the entire mitotic spindle region and in a reduced mitotic spindle region  
712 containing also CK1.2-V5 signal. For both regions, CK1.2-V5 signal was compared with  $\alpha$ -tubulin  
713 (TUB) or Hoechst 33342 (H). The signal of TUB was also compared with H. Pearson's covariation  
714 coefficients were measured from n=7 different confocal stacks which were deconvolved and corrected  
715 for chromatic aberration with Huygens Professional software. The plot was generated with GraphPad  
716 Prism software and the mean values are represented with red bold segments.

717

718 **FIGURE 5: CK1.2 localisation in amastigotes.**

719 IFA of *LdBob* pLEXSY-CK1.2-V5 axenic amastigotes, fixed with PFA (A) or obtained after detergent  
720 treatment (B). The single channel images show CK1.2-V5 (green) and Hoechst 33342 (H, blue)  
721 signals, and the transmission image (Trans). Scale bar, 2  $\mu\text{m}$ . The pictures are maximum intensity  
722 projection of the confocal stacks containing the parasites. Confocal stacks were deconvolved and  
723 corrected for chromatic aberration. (C) IFA of *LdBob* pLEXSY-CK1.2-V5 axenic amastigotes

724 obtained after detergent treatment followed by PFA fixation. The single channel and the merge images  
725 show CK1.2-V5, Hoechst 33342 (H, blue), centrin 4 (CEN, red) or IFT172 (cyan) signals and the  
726 transmission image (Trans). Scale bar, 2  $\mu$ m. These pictures are single stacks extracted from  
727 deconvolved confocal stacks corrected for chromatic aberration. Panel a shows a merged of CK1.2-  
728 V5, Hoechst 33342 (H, blue) and centrin 4 (CEN, red); Panel b shows CK1.2-V5, Hoechst 33342 (H,  
729 blue), and IFT172 (cyan) signals; 3D-reconstruction of the flagellar pocket region and its neck from  
730 image (C), which has been rotated. All confocal z-stacks containing the parasite were used for the 3D  
731 view.

732

733 **FIGURE 6: The C-terminal domain of CK1.2 is essential for its localisation to specific**  
734 **organelles, but not for its activity.**

735 (A) Cartoon representing the domain structure of *Lm*CK1.2, CK1.2 $\Delta$ C10, CK1.2 $\Delta$ C43 and CK1.2 $\Delta$ N7  
736 (GenBank: CBZ38008.1). The protein contains a kinase domain (yellow) and a C-terminal tail with  
737 two low complexity regions (LCR) (purple). (B) *In vitro* kinase assay using recombinant thio-CK1.2-  
738 V5 (WT, 55.9 kDa) and the truncated kinase mutants thio-CK1.2- $\Delta$ C10-V5 ( $\Delta$ C10, 54.9 kDa), thio-  
739 CK1.2- $\Delta$ C43-V5 ( $\Delta$ C43, 52.1 kDa) and thio-CK1.2- $\Delta$ N7-V5 ( $\Delta$ N7, 55.2 kDa). Results are  
740 representative of three independent experiments. Purified proteins were incubated with MBP as  
741 substrate, with or without D4476. Kinase assays were performed for 30 min at pH 7.5 and 30°C and  
742 reaction samples were separated by SDS-PAGE, gels were stained by Coomassie (bottom), and signals  
743 were revealed by autoradiography (top). The brackets indicate auto-phosphorylation (Auto-P) and the  
744 arrows substrate phosphorylation (MBP-P) signals. MW= Molecular Weight. (C) Western blot  
745 analysis. Proteins were extracted from *Ld*Bob pLEXSY-CK1.2-V5 (WT, 42.8 kDa) or expressing  
746 truncated kinase mutants *Ld*Bob pLEXSY-CK1.2- $\Delta$ C10-V5 ( $\Delta$ C10, 41.8 kDa), *Ld*Bob pLEXSY-  
747 CK1.2- $\Delta$ C43-V5 ( $\Delta$ C43, 39.0 kDa) and *Ld*Bob pLEXSY-CK1.2- $\Delta$ N7-V5 ( $\Delta$ N7, 42.1 kDa) in  
748 logarithmic phase promastigotes. Twenty micrograms were analysed by Western blotting (WB) using  
749 the anti-V5 antibody ( $\alpha$ -V5) (top panel). The Coomassie-stained membrane of the blot is included as a  
750 loading control (bottom panel). MW= Molecular Weight. The blot is representative of three

751 independent experiments. (D) Measurement of the sum of fluorescence intensity extracted from ROI  
752 of the promastigote parasite bodies in the mock, wild type and three domain-deletion mutants (same  
753 cell lines as in (C)). Scatter dot plots showing the sum fluorescence intensity (V5 signal) in the  
754 different cell lines in PFA-fixed (a) or detergent-treated (b) parasites. Data originates from n=54  
755 (Mock, PFA), n=88 (WT, PFA), n=63 ( $\Delta$ C10, PFA), n=80 ( $\Delta$ C43, PFA), n=68 ( $\Delta$ N7, PFA), n=62  
756 (Mock, det. treated), n=77 (WT, det. treated), n=55 ( $\Delta$ C10, det. treated), n=78 ( $\Delta$ C43, det. treated) and  
757 n=74 ( $\Delta$ N7, det. treated). The mean values and the 95% confidence intervals are indicated with bold  
758 segments. Statistically significant differences are indicated with two ( $p < 0.01$ ), three ( $p < 0.001$ ) or  
759 four asterisks ( $p < 0.0001$ ). ns. = non-significant.

760

## 761 **Supplemental figure legends**

### 762 **Figure S1: CK1.2-V5 localisation in methanol-fixed promastigotes.**

763 IFA of *Ld*Bob pLEXSY-CK1.2-V5 (A) and *Ld*Bob pLEXSY (mock, B) promastigotes, fixed in ice-  
764 cold methanol for 3 minutes and stained with anti-V5 antibody to detect CK1.2-V5 localisation. The  
765 epifluorescence images were acquired under the same conditions and show the anti-V5 staining  
766 (CK1.2-V5 or V5), Hoechst 33342 staining (H), a merge of the anti-V5 (green) and H (red) signals  
767 and the transmission image (Trans). Scale bar, 5  $\mu$ m. The pictures are maximum intensity projection  
768 of the z-stacks containing the parasites.

769

### 770 **Figure S2: Hsp90 and Hsp70 cytoplasmic localisation.**

771 (A) IFA of *Ld*Bob pLEXSY-CK1.2-V5 promastigotes fixed with PFA, and stained with anti-*Ld*Hsp90  
772 antibody to detect Hsp90 localisation. The single channel images show Hsp90 and Hoechst 33342 (H)  
773 signals and the transmission image (Trans). The merged channel shows Hsp90 (red) and H (blue)  
774 signals. Scale bar, 2  $\mu$ m. These pictures are single stacks extracted from deconvolved confocal stacks  
775 corrected for chromatic aberration. (B) IFA of *Ld*Bob pLEXSY-CK1.2-V5 promastigotes fixed with



776 PFA without detergent treatment, and stained with anti-Hsp70 antibody. The single channel images  
777 show Hsp70 and Hoechst 33342 (H) signals and the transmission image (Trans). The merged channel  
778 shows Hsp70 (red) and H (blue) signals. Scale bar, 2  $\mu$ m. These pictures are single stacks extracted  
779 from deconvolved confocal stacks corrected for chromatic aberration.

780

### 781 **Figure S3: CK1.2 localises in the nucleolus and to the mitotic spindle.**

782 (A) IFA pictures of *LdBob* pLEXSY-CK1.2-V5 promastigotes obtained after detergent treatment  
783 followed by PFA fixation and stained with anti-V5 (CK1.2-V5) and anti-L1C6 (nucleolus, L1C6)  
784 antibodies. Confocal images representing sequential events of mitosis revealed different localisation  
785 patterns of L1C6 nucleolar marker and CK1.2-V5. (a – f) The images correspond to the transmission  
786 (Trans), the merged containing CK1.2-V5 (green), Hoechst 33342 (H) (blue) and L1C6 (red) signals.  
787 The following four images show a magnification of the nuclear region with the merged and single  
788 channel images. N=nucleus, K=kinetoplast. Scale bar, 2  $\mu$ m or 1  $\mu$ m for magnified images. These  
789 pictures are single stacks extracted from deconvolved confocal stacks corrected for chromatic  
790 aberration. (B) IFA pictures of *LdBob* pLEXSY-CK1.2-V5 promastigotes obtained after detergent  
791 treatment followed by PFA fixation and stained with anti-V5 and anti- $\alpha$ -tubulin antibodies. Sequential  
792 images of various stages of cell division (a – e) showing the single channel images for CK1.2-V5, H  
793 and  $\alpha$ -tubulin signals, the merged images showing CK1.2-V5 (green), H (blue) and  $\alpha$ -tubulin (red)  
794 signals, and the transmission image (Trans). Scale bar, 2  $\mu$ m. These pictures are single stacks extracted  
795 from deconvolved confocal stacks corrected for chromatic aberration.

796

### 797 **Figure S4: Inhibition of proteasomal and lysosomal degradation.**

798 (A) Proteosomal degradation. (a) Logarithmic phase promastigotes, from the same cell lines as in  
799 (Figure 6C), were treated by the proteasome inhibitor MG132 for 18h. Proteins from treated and  
800 untreated control were extracted and twenty micrograms were analysed by Western blotting (WB)  
801 using  $\alpha$ -V5 (top panel). The Coomassie-stained membrane of the blot is included as a loading control

802 (bottom panels). MW= Molecular Weight. The blots are representative of three independent  
803 experiments. (b) Logarithmic phase promastigotes from *LdBob* pLEXSY-CK1.2-V5 (WT) or  
804 expressing truncated kinase mutants *LdBob* pLEXSY-CK1.2- $\Delta$ C10-V5 ( $\Delta$ C10), *LdBob* pLEXSY-  
805 CK1.2- $\Delta$ C43-V5 ( $\Delta$ C43) and *LdBob* pLEXSY-CK1.2- $\Delta$ N7-V5 ( $\Delta$ N7) were treated with the  
806 proteasome inhibitor MG132 for 18h. Proteins from treated and untreated samples were extracted and  
807 twenty micrograms were analysed by Western blotting using the mono- and poly-ubiquitinated  
808 conjugates monoclonal (FK2) antibody ( $\alpha$ -Ubiquitin) (left panel). The Coomassie-stained membrane  
809 of the blot is included as a loading control (right panel). MW= Molecular Weight. The blot is  
810 representative of two independent experiments. (B) Lysosomal degradation. (a) Logarithmic phase  
811 promastigotes from the same cell lines as in (Figure 6C) were treated by ammonium chloride ( $\text{NH}_4\text{Cl}$ ),  
812 an inhibitor of lysosomal degradation, for 18h. Proteins from treated and untreated control were  
813 extracted and twenty micrograms were analysed by Western blotting (WB) using  $\alpha$ -V5 (top panel).  
814 The Coomassie-stained membrane of the blot is included as a loading control (bottom panels). MW=  
815 Molecular Weight. The blots are representative of three independent experiments. (b) Logarithmic  
816 phase promastigotes from *LdBob* pLEXSY-CK1.2-V5 (WT) or expressing truncated kinase mutants  
817 *LdBob* pLEXSY-CK1.2- $\Delta$ C10-V5 ( $\Delta$ C10), *LdBob* pLEXSY-CK1.2- $\Delta$ C43-V5 ( $\Delta$ C43) and *LdBob*  
818 pLEXSY-CK1.2- $\Delta$ N7-V5 ( $\Delta$ N7) were treated with ammonium chloride for 18h to inhibit the  
819 lysosomal degradation. Untreated parasites were used as control. Lysosomes of the parasites were then  
820 stained with 100 mM LysoTracker™ Red DND-99 for 30 min at 26°C. Mean fluorescence intensity of  
821 the LysoTracker accumulation in lysosomes was measured by flow cytometry in treated (black) and  
822 untreated (grey) parasites for ~15000 parasites. The data are representative of two independent  
823 experiments. The graph was generated with GraphPad Prism software.

824

## 825 **Figure S5: Position of the LCR in human CK1s.**

826 Cartoon representing the low complexity region (LCR, dark grey) on the protein sequence (light grey)  
827 of human CK1. CK1A (P48729), CK1D (P48730), CK1E (P49674), CK1G1 (Q9HCP0), CK1G2  
828 (P78368) and CK1G3 (Q9Y6M4).

829 **Figure S6: Protocol for automatic segmentation of parasite bodies.**

830 Screenshot of the protocol applied on the epifluorescence images to analyse diverse parameters of the  
831 parasite body of *LdBob* pLEXSY-CK1.2-V5, mock or domain-deleted mutants, stained with the anti-  
832 V5 antibody to detect CK1.2-V5 localisation. Protocol is a graphical programming plugin in Icy  
833 software (Icy, RRID:SCR010)

834

835 **References**

836

837

- 838 1. Knippschild, U., Kruger, M., Richter, J., Xu, P., Garcia-Reyes, B., Peifer, C., Halekotte, J.,  
839 Bakulev, V., and Bischof, J. (2014). The CK1 Family: Contribution to Cellular Stress  
840 Response and Its Role in Carcinogenesis. *Front Oncol* 4, 96.
- 841 2. Knippschild, U., Gocht, A., Wolff, S., Huber, N., Lohler, J., and Stoter, M. (2005). The casein  
842 kinase 1 family: participation in multiple cellular processes in eukaryotes. *Cell Signal* 17, 675-  
843 689.
- 844 3. Schittek, B., and Sinnberg, T. (2014). Biological functions of casein kinase 1 isoforms and  
845 putative roles in tumorigenesis. *Mol Cancer* 13, 231.
- 846 4. Jiang, S., Zhang, M., Sun, J., and Yang, X. (2018). Casein kinase 1alpha: biological  
847 mechanisms and theranostic potential. *Cell Commun Signal* 16, 23.
- 848 5. Greer, Y.E., Westlake, C.J., Gao, B., Bharti, K., Shiba, Y., Xavier, C.P., Pazour, G.J., Yang,  
849 Y., and Rubin, J.S. (2014). Casein kinase 1delta functions at the centrosome and Golgi to  
850 promote ciliogenesis. *Molecular biology of the cell* 25, 1629-1640.
- 851 6. Greer, Y.E., and Rubin, J.S. (2011). Casein kinase 1 delta functions at the centrosome to  
852 mediate Wnt-3a-dependent neurite outgrowth. *J Cell Biol* 192, 993-1004.
- 853 7. Peng, Y., Moritz, M., Han, X., Giddings, T.H., Lyon, A., Kollman, J., Winey, M., Yates, J.,  
854 3rd, Agard, D.A., Drubin, D.G., et al. (2015b). Interaction of CK1delta with gammaTuSC  
855 ensures proper microtubule assembly and spindle positioning. *Molecular biology of the cell*  
856 26, 2505-2518.
- 857 8. Kafadar, K.A., Zhu, H., Snyder, M., and Cyert, M.S. (2003). Negative regulation of  
858 calcineurin signaling by Hrr25p, a yeast homolog of casein kinase I. *Genes Dev* 17, 2698-  
859 2708.
- 860 9. Lusk, C.P., Waller, D.D., Makhnevych, T., Dienemann, A., Whiteway, M., Thomas, D.Y., and  
861 Wozniak, R.W. (2007). Nup53p is a target of two mitotic kinases, Cdk1p and Hrr25p. *Traffic*  
862 8, 647-660.
- 863 10. Peng, Y., Grassart, A., Lu, R., Wong, C.C.L., Yates, J., 3rd, Barnes, G., and Drubin, D.G.  
864 (2015a). Casein kinase 1 promotes initiation of clathrin-mediated endocytosis. *Dev Cell* 32,  
865 231-240.
- 866 11. Zhang, B., Shi, Q., Varia, S.N., Xing, S., Klett, B.M., Cook, L.A., and Herman, P.K. (2016).  
867 The Activity-Dependent Regulation of Protein Kinase Stability by the Localization to P-  
868 Bodies. *Genetics* 203, 1191-1202.
- 869 12. Dorin-Semlat, D., Demarta-Gatsi, C., Hamelin, R., Armand, F., Carvalho, T.G., Moniatte,  
870 M., and Doerig, C. (2015). Malaria Parasite-Infected Erythrocytes Secrete PfCK1, the  
871 Plasmodium Homologue of the Pleiotropic Protein Kinase Casein Kinase 1. *PloS one* 10,  
872 e0139591.

- 873 13. Rachidi, N., Taly, J.F., Durieu, E., Leclercq, O., Aulner, N., Prina, E., Pescher, P., Notredame,  
874 C., Meijer, L., and Spath, G.F. (2014). Pharmacological assessment defines the *Leishmania*  
875 *donovani* casein kinase 1 as a drug target and reveals important functions in parasite viability  
876 and intracellular infection. *Antimicrob Agents Chemother* 58.
- 877 14. Silverman, J.M., and Reiner, N.E. (2010). Exosomes and other microvesicles in infection  
878 biology: organelles with unanticipated phenotypes. *Cell Microbiol* 13, 1-9.
- 879 15. Jayaswal, S., Kamal, M.A., Dua, R., Gupta, S., Majumdar, T., Das, G., Kumar, D., and Rao,  
880 K.V. (2010). Identification of host-dependent survival factors for intracellular *Mycobacterium*  
881 *tuberculosis* through an siRNA screen. *PLoS pathogens* 6, e1000839.
- 882 16. Xia, C., Wolf, J.J., Vijayan, M., Studstill, C.J., Ma, W., and Hahm, B. (2018). Casein Kinase  
883 Ialpha Mediates the Degradation of Receptors for Type I and Type II Interferons Caused by  
884 Hemagglutinin of Influenza A Virus. *J Virol* 92.
- 885 17. Zhang, L., Li, H., Chen, Y., Gao, X., Lu, Z., Gao, L., Wang, Y., Gao, Y., Gao, H., Liu, C., et  
886 al. (2017). The down-regulation of casein kinase 1 alpha as a host defense response against  
887 infectious bursal disease virus infection. *Virology* 512, 211-221.
- 888 18. Cegielska, A., and Virshup, D.M. (1993). Control of simian virus 40 DNA replication by the  
889 HeLa cell nuclear kinase casein kinase I. *Mol Cell Biol* 13, 1202-1211.
- 890 19. Sudha, G., Yamunadevi, S., Tyagi, N., Das, S., and Srinivasan, N. (2012). Structural and  
891 molecular basis of interaction of HCV non-structural protein 5A with human casein kinase  
892 Ialpha and PKR. *BMC structural biology* 12, 28.
- 893 20. Bhattacharya, D., Ansari, I.H., and Striker, R. (2009). The flaviviral methyltransferase is a  
894 substrate of Casein Kinase 1. *Virus research* 141, 101-104.
- 895 21. Solyakov, L., Halbert, J., Alam, M.M., Semblat, J.P., Dorin-Semblat, D., Reininger, L.,  
896 Bottrill, A.R., Mistry, S., Abdi, A., Fennell, C., et al. (2011). Global kinomic and phospho-  
897 proteomic analyses of the human malaria parasite *Plasmodium falciparum*. *Nat Commun* 2,  
898 565.
- 899 22. Silverman, J.M., Clos, J., de'Oliveira, C.C., Shirvani, O., Fang, Y., Wang, C., Foster, L.J., and  
900 Reiner, N.E. (2010). An exosome-based secretion pathway is responsible for protein export  
901 from *Leishmania* and communication with macrophages. *J Cell Sci* 123, 842-852.
- 902 23. Dan-Goor, M., Nasereddin, A., Jaber, H., and Jaffe, C.L. (2013). Identification of a secreted  
903 casein kinase 1 in *Leishmania donovani*: effect of protein over expression on parasite growth  
904 and virulence. *PLoS one* 8, e79287.
- 905 24. Atayde, V.D., Suau, H.A., Townsend, S., Hassani, K., Kamhawi, S., and Olivier, M. (2015).  
906 Exosome secretion by the parasitic protozoan *Leishmania* within the sand fly midgut. *Cell*  
907 *reports* 13, 957-967.
- 908 25. Liu, J., Carvalho, L.P., Bhattacharya, S., Carbone, C.J., Kumar, K.G., Leu, N.A., Yau, P.M.,  
909 Donald, R.G., Weiss, M.J., Baker, D.P., et al. (2009). Mammalian casein kinase Ialpha and its  
910 leishmanial ortholog regulate stability of IFNAR1 and type I interferon signaling. *Mol Cell*  
911 *Biol* 29, 6401-6412.
- 912 26. Xu, P., Ianes, C., Gartner, F., Liu, C., Burster, T., Bakulev, V., Rachidi, N., Knippschild, U.,  
913 and Bischof, J. (2019). Structure, regulation, and (patho-)physiological functions of the stress-  
914 induced protein kinase CK1 delta (CSNK1D). *Gene* 715, 144005.
- 915 27. Fulcher, L.J., Bozatz, P., Tachie-Menson, T., Wu, K.Z.L., Cummins, T.D., Bufton, J.C.,  
916 Pinkas, D.M., Dunbar, K., Shrestha, S., Wood, N.T., et al. (2018). The DUF1669 domain of  
917 FAM83 family proteins anchor casein kinase 1 isoforms. *Science signaling* 11.
- 918 28. Vaughan, S., and Gull, K. (2015). Basal body structure and cell cycle-dependent biogenesis in  
919 *Trypanosoma brucei*. *Cilia* 5, 5.
- 920 29. Selvapandiyan, A., Kumar, P., Morris, J.C., Salisbury, J.L., Wang, C.C., Nakhasi, H.L., and  
921 Cohen-Fix, O. (2007). Centrin1 Is Required for Organelle Segregation and Cytokinesis in  
922 *Trypanosoma brucei*. *Molecular Biology of the Cell* 18, 3290-3301.
- 923 30. Shi, J., Franklin, J.B., Yelinek, J.T., Ebersberger, I., Warren, G., and He, C.Y. (2008).  
924 Centrin4 coordinates cell and nuclear division in *T. brucei*. *Journal of cell science* 121, 3062-  
925 3070.
- 926 31. Sunter, J.D., Yanase, R., Wang, Z., Catta-Preta, C.M.C., Moreira-Leite, F., Myskova, J.,  
927 Pruzinova, K., Volf, P., Mottram, J.C., and Gull, K. (2019). *Leishmania flagellum* attachment

- 928 zone is critical for flagellar pocket shape, development in the sand fly, and pathogenicity in  
929 the host. *Proceedings of the National Academy of Sciences of the United States of America*  
930 *116*, 6351-6360.
- 931 32. Eliaz, D., Kannan, S., Shaked, H., Arvatz, G., Tkacz, I.D., Binder, L., Waldman Ben-Asher,  
932 H., Okalang, U., Chikne, V., Cohen-Chalamish, S., et al. (2017). Exosome secretion affects  
933 social motility in *Trypanosoma brucei*. *PLoS pathogens* *13*, e1006245.
- 934 33. Thery, C., Ostrowski, M., and Segura, E. (2009). Membrane vesicles as conveyors of immune  
935 responses. *Nat Rev Immunol* *9*, 581-593.
- 936 34. Muller, P., Ruckova, E., Halada, P., Coates, P.J., Hrstka, R., Lane, D.P., and Vojtesek, B.  
937 (2012). C-terminal phosphorylation of Hsp70 and Hsp90 regulates alternate binding to co-  
938 chaperones CHIP and HOP to determine cellular protein folding/degradation balances.  
939 *Oncogene*.
- 940 35. Hombach-Barrigah, A., Bartsch, K., Smirlis, D., Rosenqvist, H., MacDonald, A., Dingli, F.,  
941 Loew, D., Spath, G.F., Rachidi, N., Wiese, M., et al. (2019). *Leishmania donovani* 90 kD Heat  
942 Shock Protein - Impact of Phosphosites on Parasite Fitness, Infectivity and Casein Kinase  
943 Affinity. *Scientific reports* *9*, 5074.
- 944 36. Demmel, L., Schmidt, K., Lucast, L., Havlicek, K., Zankel, A., Koestler, T., Reithofer, V., de  
945 Camilli, P., and Warren, G. (2016). The endocytic activity of the flagellar pocket in  
946 *Trypanosoma brucei* is regulated by an adjacent phosphatidylinositol phosphate kinase. *J Cell*  
947 *Sci* *129*, 2285.
- 948 37. Wheeler, R.J., Sunter, J.D., and Gull, K. (2016). Flagellar pocket restructuring through the  
949 *Leishmania* life cycle involves a discrete flagellum attachment zone. *J Cell Sci* *129*, 854-867.
- 950 38. Názer, E., and Sánchez, D.O. (2011). Nucleolar Accumulation of RNA Binding Proteins  
951 Induced by ActinomycinD Is Functional in *Trypanosoma cruzi* and *Leishmania mexicana* but  
952 Not in *T. brucei*. *PloS one* *6*, e24184.
- 953 39. Motta, M.C.M., Souza, W.d., and Thiry, M. (2003). Immunocytochemical detection of DNA  
954 and RNA in endosymbiont-bearing trypanosomatids. *FEMS Microbiology Letters* *221*, 17-23.
- 955 40. Ogbadoyi, E., Ersfeld, K., Robinson, D., Sherwin, T., and Gull, K. (2000). Architecture of the  
956 *Trypanosoma brucei* nucleus during interphase and mitosis. *Chromosoma* *108*, 501-513.
- 957 41. Kumar, G., Kajuluri, L.P., Gupta, C.M., and Sahasrabuddhe, A.A. (2016). A twinfilin-like  
958 protein coordinates karyokinesis by influencing mitotic spindle elongation and DNA  
959 replication in *Leishmania*. *Mol Microbiol* *100*, 173-187.
- 960 42. Stoter, M., Bamberger, A.-M., Aslan, B., Kurth, M., Speidel, D., Loning, T., Frank, H.-G.,  
961 Kaufmann, P., Lohler, J., Henne-Bruns, D., et al. (2005). Inhibition of casein kinase I delta  
962 alters mitotic spindle formation and induces apoptosis in trophoblast cells. *Oncogene* *24*,  
963 7964-7975.
- 964 43. Boucher, N., Dacheux, D., Giroud, C., and Baltz, T. (2007). An essential cell cycle-regulated  
965 nucleolar protein relocates to the mitotic spindle where it is involved in mitotic progression in  
966 *Trypanosoma brucei*. *J Biol Chem* *282*, 13780-13790.
- 967 44. Schitteck, B., and Sinnberg, T. (2014). Biological functions of casein kinase 1 isoforms and  
968 putative roles in tumorigenesis. *Mol Cancer* *13*, 231.
- 969 45. Martel, D., Beneke, T., Gluenz, E., Spath, G.F., and Rachidi, N. (2017). Characterisation of  
970 Casein Kinase 1.1 in *Leishmania donovani* Using the CRISPR Cas9 Toolkit. *BioMed research*  
971 *international* *2017*, 4635605.
- 972 46. Qin, H., Shao, Q., Igdoura, S.A., Alaoui-Jamali, M.A., and Laird, D.W. (2003). Lysosomal  
973 and proteasomal degradation play distinct roles in the life cycle of Cx43 in gap junctional  
974 intercellular communication-deficient and -competent breast tumor cells. *J Biol Chem* *278*,  
975 30005-30014.
- 976 47. Besteiro, S. (2017). Autophagy in apicomplexan parasites. *Current opinion in microbiology*  
977 *40*, 14-20.
- 978 48. Crawford, L.J., Walker, B., Ovaa, H., Chauhan, D., Anderson, K.C., Morris, T.C., and Irvine,  
979 A.E. (2006). Comparative selectivity and specificity of the proteasome inhibitors  
980 BzLLCCHO, PS-341, and MG-132. *Cancer Res* *66*, 6379-6386.
- 981 49. Donald, R.G., Zhong, T., Meijer, L., and Liberator, P.A. (2005). Characterization of two *T.*  
982 *gondii* CK1 isoforms. *Mol Biochem Parasitol* *141*, 15-27.

- 983 50. Hubstenberger, A., Courel, M., Benard, M., Souquere, S., Ernoult-Lange, M., Chouaib, R., Yi,  
984 Z., Morlot, J.B., Munier, A., Fradet, M., et al. (2017). P-Body Purification Reveals the  
985 Condensation of Repressed mRNA Regulons. *Mol Cell* 68, 144-157 e145.
- 986 51. Dallagiovanna, B., Correa, A., Probst, C.M., Holetz, F., Smircich, P., de Aguiar, A.M.,  
987 Mansur, F., da Silva, C.V., Mortara, R.A., Garat, B., et al. (2008). Functional genomic  
988 characterization of mRNAs associated with TcPUF6, a pumilio-like protein from  
989 *Trypanosoma cruzi*. *J Biol Chem* 283, 8266-8273.
- 990 52. Kramer, S., Queiroz, R., Ellis, L., Webb, H., Hoheisel, J.D., Clayton, C., and Carrington, M.  
991 (2008). Heat shock causes a decrease in polysomes and the appearance of stress granules in  
992 trypanosomes independently of eIF2(alpha) phosphorylation at Thr169. *J Cell Sci* 121, 3002-  
993 3014.
- 994 53. Cassola, A., De Gaudenzi, J.G., and Frasch, A.C. (2007). Recruitment of mRNAs to  
995 cytoplasmic ribonucleoprotein granules in trypanosomes. *Mol Microbiol* 65, 655-670.
- 996 54. Minia, I., and Clayton, C. (2016). Regulating a Post-Transcriptional Regulator: Protein  
997 Phosphorylation, Degradation and Translational Blockage in Control of the Trypanosome  
998 Stress-Response RNA-Binding Protein ZC3H11. *PLoS pathogens* 12, e1005514.
- 999 55. Droll, D., Minia, I., Fadda, A., Singh, A., Stewart, M., Queiroz, R., and Clayton, C. (2013).  
1000 Post-transcriptional regulation of the trypanosome heat shock response by a zinc finger  
1001 protein. *PLoS pathogens* 9, e1003286.
- 1002 56. Lee, K.H., Johmura, Y., Yu, L.R., Park, J.E., Gao, Y., Bang, J.K., Zhou, M., Veenstra, T.D.,  
1003 Yeon Kim, B., and Lee, K.S. (2012). Identification of a novel Wnt5a-CK1varepsilon-Dvl2-  
1004 Plk1-mediated primary cilia disassembly pathway. *The EMBO journal* 31, 3104-3117.
- 1005 57. Subota, I., Julkowska, D., Vincensini, L., Reeg, N., Buisson, J., Blisnick, T., Huet, D., Perrot,  
1006 S., Santi-Rocca, J., Duchateau, M., et al. (2014). Proteomic analysis of intact flagella of  
1007 procyclic *Trypanosoma brucei* cells identifies novel flagellar proteins with unique sub-  
1008 localization and dynamics. *Molecular & cellular proteomics : MCP* 13, 1769-1786.
- 1009 58. Beneke, T., Demay, F., Hookway, E., Ashman, N., Jeffery, H., Smith, J., Valli, J., Becvar, T.,  
1010 Myskova, J., Lestinova, T., et al. (2018). Genetic dissection of a *Leishmania*  
1011 flagellar proteome demonstrates requirement for directional motility in sand fly infections.  
1012 bioRxiv, 476994.
- 1013 59. Boesger, J., Wagner, V., Weisheit, W., and Mittag, M. (2012). Application of  
1014 phosphoproteomics to find targets of casein kinase 1 in the flagellum of chlamydomonas.  
1015 *International journal of plant genomics* 2012, 581460.
- 1016 60. Perry, J.A., Sinclair-Davis, A.N., McAllaster, M.R., and de Graffenried, C.L. (2018).  
1017 TbSmeel regulates hook complex morphology and the rate of flagellar pocket uptake in  
1018 *Trypanosoma brucei*. *Mol Microbiol* 107, 344-362.
- 1019 61. Zemp, I., Wandrey, F., Rao, S., Ashiono, C., Wyler, E., Montellese, C., and Kutay, U. (2014).  
1020 CK1delta and CK1epsilon are components of human 40S subunit precursors required for  
1021 cytoplasmic 40S maturation. *J Cell Sci* 127, 1242-1253.
- 1022 62. Ghalei, H., Schaub, F.X., Doherty, J.R., Noguchi, Y., Roush, W.R., Cleveland, J.L., Stroupe,  
1023 M.E., and Karbstein, K. (2015). Hrr25/CK1delta-directed release of Ltv1 from pre-40S  
1024 ribosomes is necessary for ribosome assembly and cell growth. *J Cell Biol* 208, 745-759.
- 1025 63. Andersen, J.S., Lam, Y.W., Leung, A.K., Ong, S.E., Lyon, C.E., Lamond, A.I., and Mann, M.  
1026 (2005). Nucleolar proteome dynamics. *Nature* 433, 77-83.
- 1027 64. Zhou, Q., Lee, K.J., Kurasawa, Y., Hu, H., An, T., and Li, Z. (2018). Faithful chromosome  
1028 segregation in *Trypanosoma brucei* requires a cohort of divergent spindle-associated proteins  
1029 with distinct functions. *Nucleic acids research* 46, 8216-8231.
- 1030 65. Fulcher, L.J., He, Z., Mei, L., Macartney, T., Wood, N., Prescott, A.R., Whigham, A.,  
1031 Varghese, J., Gourlay, R., Ball, G., et al. (2018). FAM83D directs protein kinase CK1alpha to the  
1032 mitotic spindle for proper spindle positioning. bioRxiv, 480616.
- 1033 66. Urbaniak, M.D. (2009). Casein kinase 1 isoform 2 is essential for bloodstream form  
1034 *Trypanosoma brucei*. *Molecular and Biochemical Parasitology* 166, 183-185.
- 1035 67. Coletta, A., Pinney, J.W., Solis, D.Y., Marsh, J., Pettifer, S.R., and Attwood, T.K. (2010).  
1036 Low-complexity regions within protein sequences have position-dependent roles. *BMC*  
1037 *systems biology* 4, 43.

- 1038 68. Aslett, M., Aurrecochea, C., Berriman, M., Brestelli, J., Brunk, B.P., Carrington, M.,  
1039 Depledge, D.P., Fischer, S., Gajria, B., Gao, X., et al. (2010). TriTrypDB: a functional  
1040 genomic resource for the Trypanosomatidae. *Nucleic acids research* 38, D457-462.
- 1041 69. Silverman, J.M., Clos, J., Horakova, E., Wang, A.Y., Wiesgigl, M., Kelly, I., Lynn, M.A.,  
1042 McMaster, W.R., Foster, L.J., Levings, M.K., et al. (2010). Leishmania exosomes modulate  
1043 innate and adaptive immune responses through effects on monocytes and dendritic cells. *J*  
1044 *Immunol* 185, 5011-5022.
- 1045 70. Schultz, J., Milpetz, F., Bork, P., and Ponting, C.P. (1998). SMART, a simple modular  
1046 architecture research tool: identification of signaling domains. *Proceedings of the National*  
1047 *Academy of Sciences of the United States of America* 95, 5857-5864.
- 1048 71. Sacerdoti-Sierra, N., and Jaffe, C.L. (1997). Release of ecto-protein kinases by the protozoan  
1049 parasite *Leishmania major*. *J Biol Chem* 272, 30760-30765.
- 1050 72. Bohm, T., Meng, Z., Haas, P., Henne-Bruns, D., Rachidi, N., Knippschild, U., and Bischof, J.  
1051 (2019). The kinase domain of CK1delta can be phosphorylated by Chk1. *Bioscience,*  
1052 *biotechnology, and biochemistry*, 1-13.
- 1053 73. Durieu, E., Prina, E., Leclercq, O., Oumata, N., Gaboriaud-Kolar, N., Vougiannopoulou,  
1054 K., Aulner, N., Defontaine, A., No, J.H., Ruchaud, S., et al. (2016). From Drug Screening to  
1055 Target Deconvolution: a Target-Based Drug Discovery Pipeline Using *Leishmania* Casein  
1056 Kinase 1 Isoform 2 To Identify Compounds with Antileishmanial Activity. *Antimicrobial*  
1057 *Agents and Chemotherapy* 60, 2822-2833.
- 1058 74. Florimond, C., Sahin, A., Vidilaseris, K., Dong, G., Landrein, N., Dacheux, D., Albisetti, A.,  
1059 Byard, E.H., Bonhivers, M., and Robinson, D.R. (2015). BILBO1 Is a Scaffold Protein of the  
1060 Flagellar Pocket Collar in the Pathogen *Trypanosoma brucei*. *PLoS pathogens* 11, e1004654.
- 1061 75. Selvapandiyam, A., Duncan, R., Debrabant, A., Bertholet, S., Sreenivas, G., Negi, N.S.,  
1062 Salotra, P., and Nakhasi, H.L. (2001). Expression of a mutant form of *Leishmania donovani*  
1063 centrin reduces the growth of the parasite. *J Biol Chem* 276, 43253-43261.
- 1064 76. Absalon, S., Blisnick, T., Kohl, L., Toutirais, G., Dore, G., Julkowska, D., Tavenet, A., and  
1065 Bastin, P. (2008). Intraflagellar transport and functional analysis of genes required for  
1066 flagellum formation in trypanosomes. *Mol Biol Cell* 19, 929-944.
- 1067 77. Kohl, L., Sherwin, T., and Gull, K. (1999). Assembly of the Paraflagellar Rod and the  
1068 Flagellum Attachment Zone Complex During the *Trypanosoma brucei* Cell Cycle. *Journal of*  
1069 *Eukaryotic Microbiology* 46, 105-109.
- 1070 78. Devaux, S., Kelly, S., Lecordier, L., Wickstead, B., Perez-Morga, D., Pays, E., Vanhamme,  
1071 L., and Gull, K. (2007). Diversification of function by different isoforms of conventionally  
1072 shared RNA polymerase subunits. *Mol Biol Cell* 18, 1293-1301.
- 1073 79. Hombach, A., Ommen, G., Chrobak, M., and Clos, J. (2013). The Hsp90–Sti1 interaction is  
1074 critical for *Leishmania donovani* proliferation in both life cycle stages. *Cellular Microbiology*  
1075 15, 585-600.
- 1076 80. Schindelin, J., Arganda-Carreras, I., Frise, E., Kaynig, V., Longair, M., Pietzsch, T., Preibisch,  
1077 S., Rueden, C., Saalfeld, S., Schmid, B., et al. (2012). Fiji: an open-source platform for  
1078 biological-image analysis. *Nature methods* 9, 676-682.
- 1079 81. de Chaumont, F., Dallongeville, S., Chenouard, N., Herve, N., Pop, S., Provoost, T., Meas-  
1080 Yedid, V., Pankajakshan, P., Lecomte, T., Le Montagner, Y., et al. (2012). Icy: an open  
1081 bioimage informatics platform for extended reproducible research. *Nature methods* 9, 690-  
1082 696.
- 1083 82. Dufour, A., Meas-Yedid, V., Grassart, A., and Olivo-Marin, J.- (2008). Automated  
1084 quantification of cell endocytosis using active contours and wavelets. 19th International  
1085 Conference on Pattern Recognition, 1-4.
- 1086 83. Dufour, A., Thibeaux, R., Labruyere, E., Guillen, N., and Olivo-Marin, J.C. (2011). 3-D active  
1087 meshes: fast discrete deformable models for cell tracking in 3-D time-lapse microscopy. *IEEE*  
1088 *transactions on image processing : a publication of the IEEE Signal Processing Society* 20,  
1089 1925-1937.

1090

Figure 1

A

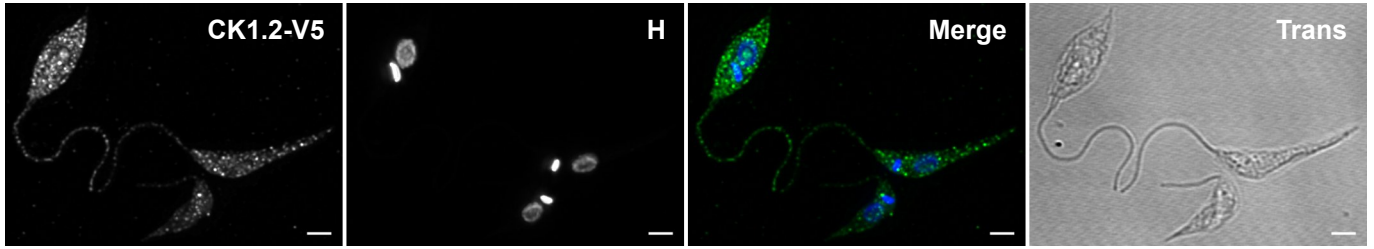

B

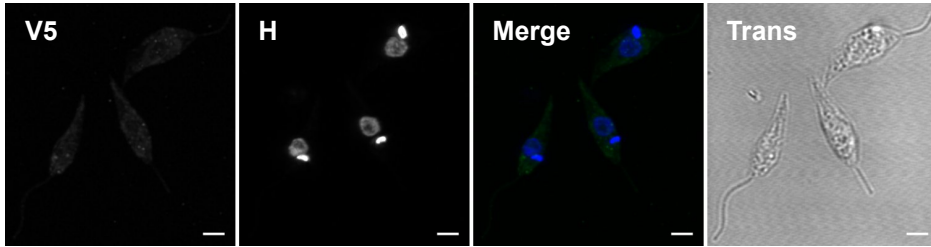

C

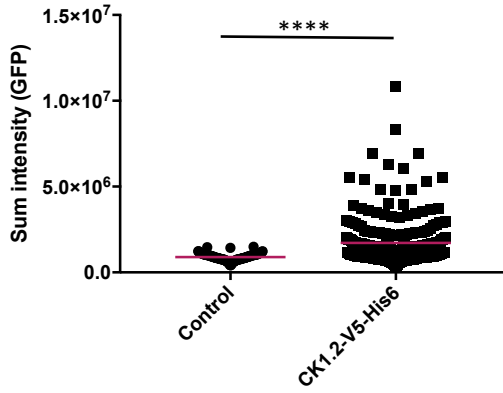

D

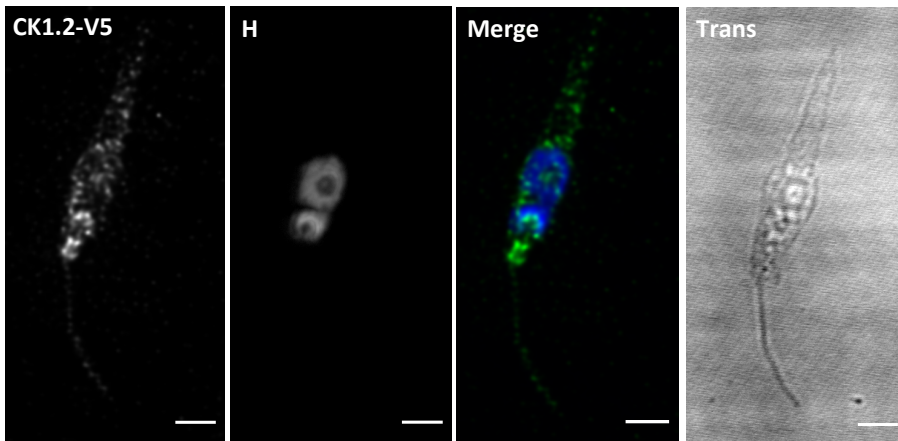



**Figure 2**

**A**

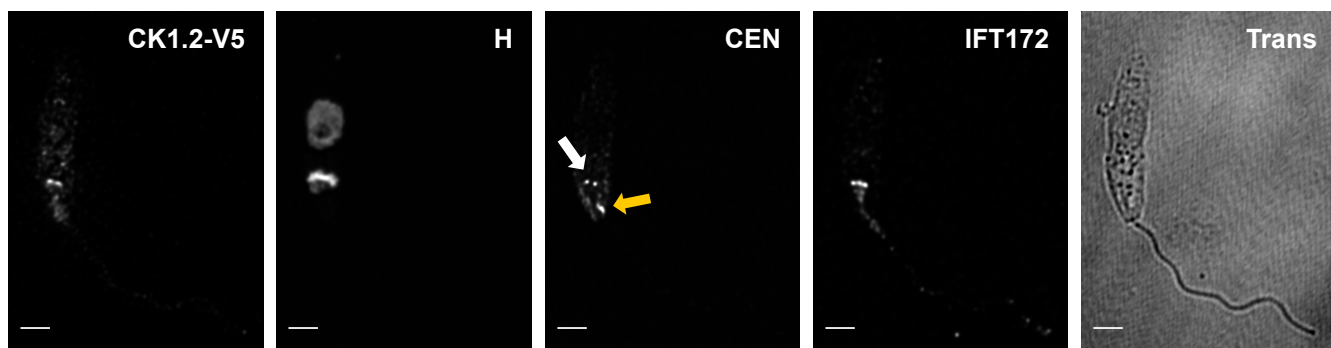

**B**

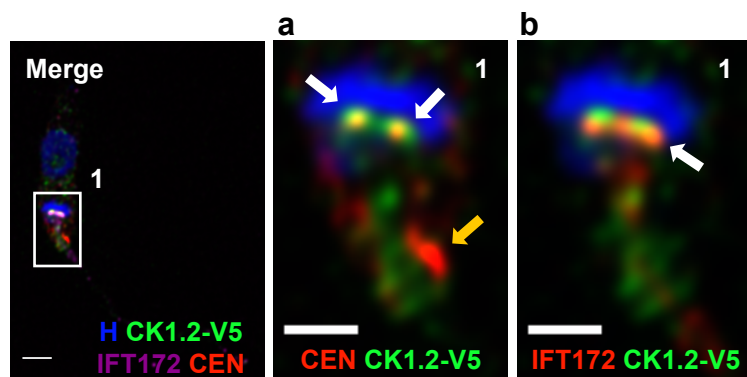

**C**

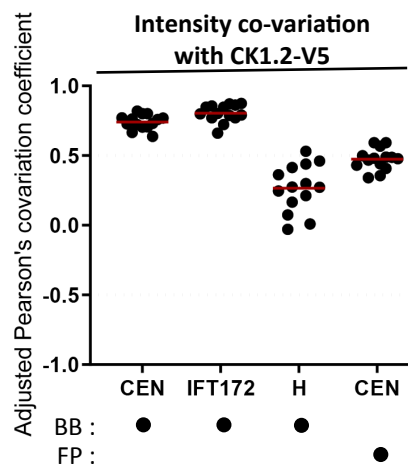

**D**

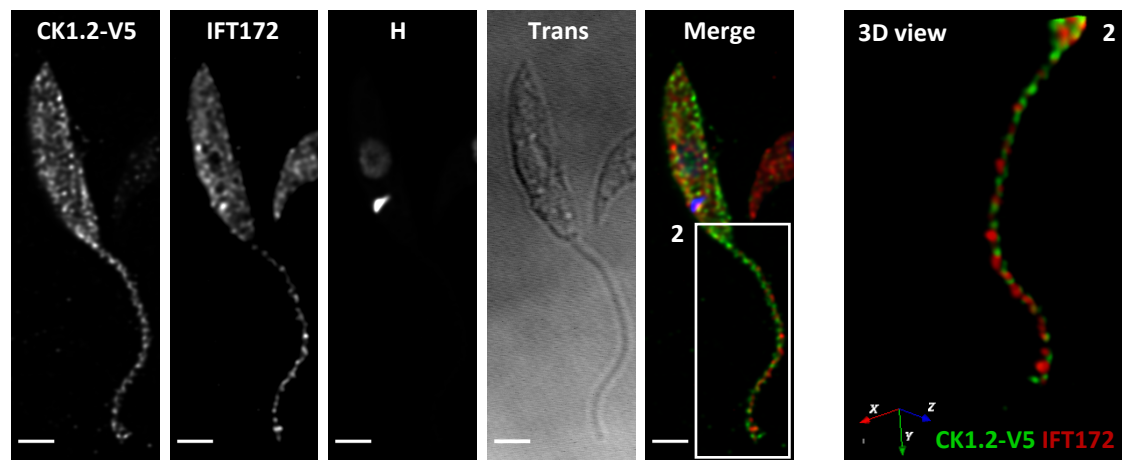

**E**

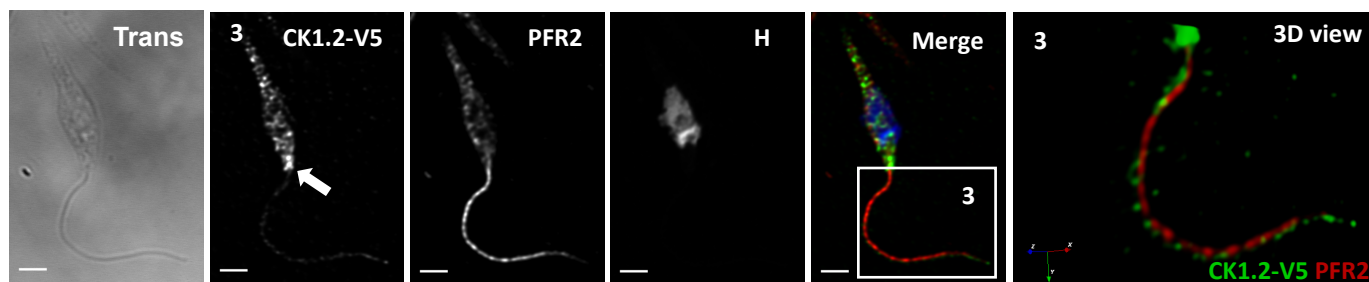

Figure 3

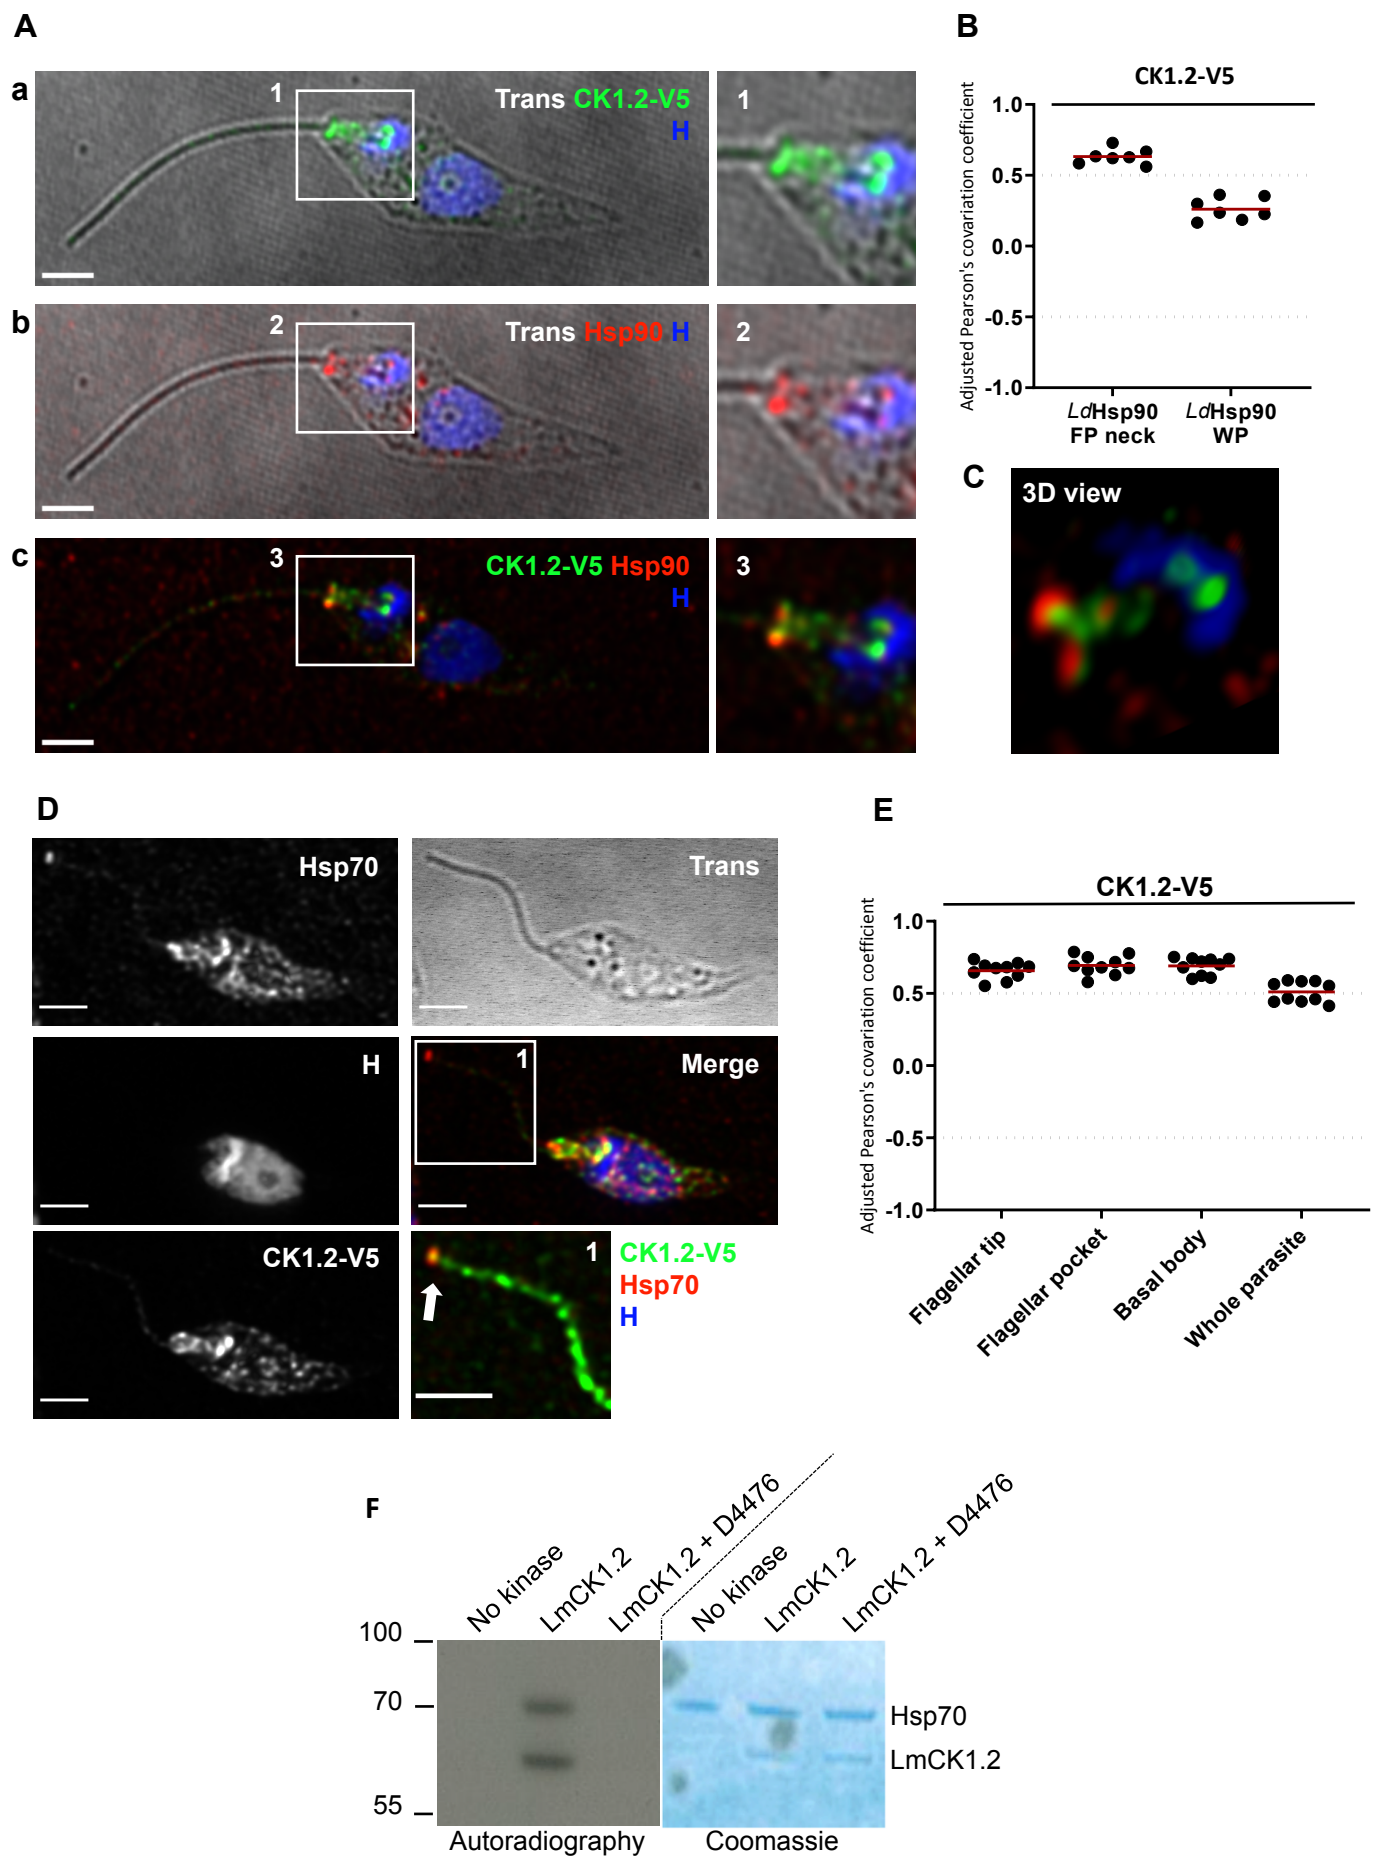

Figure 4

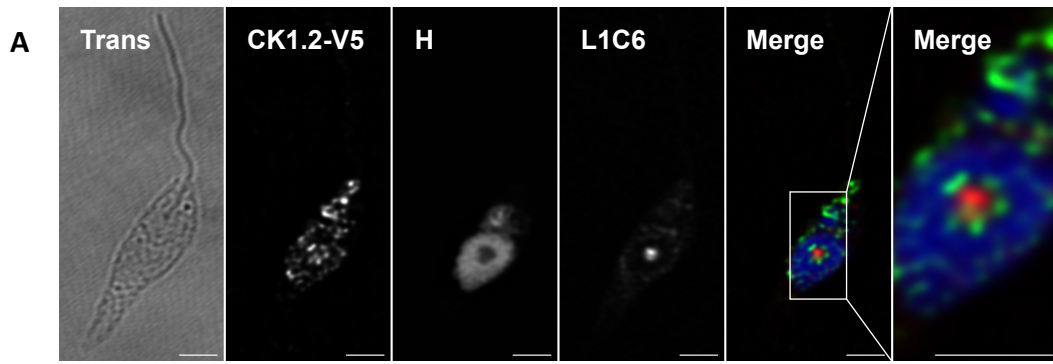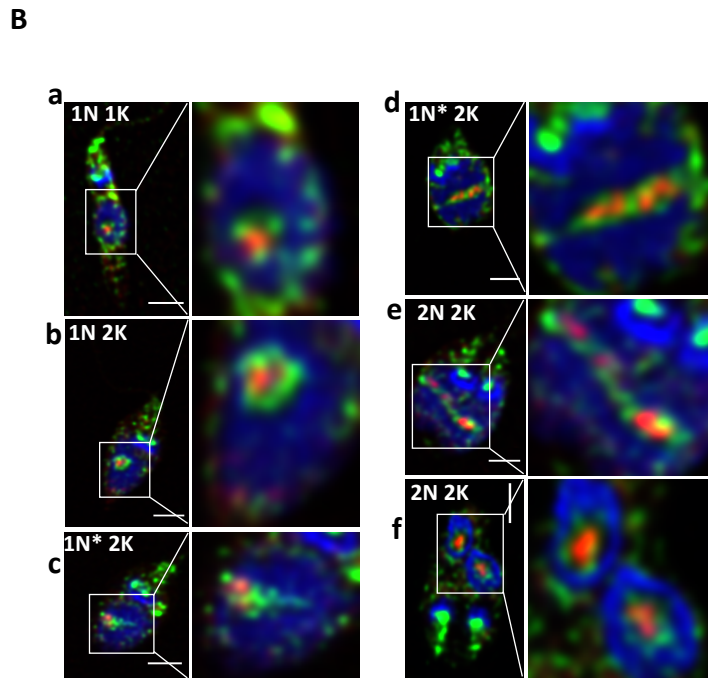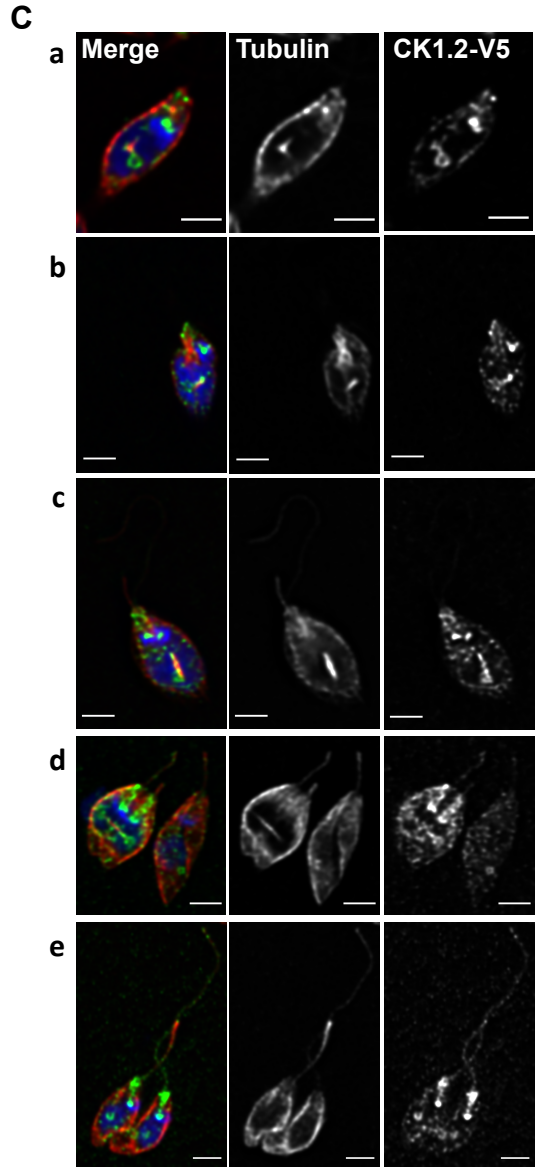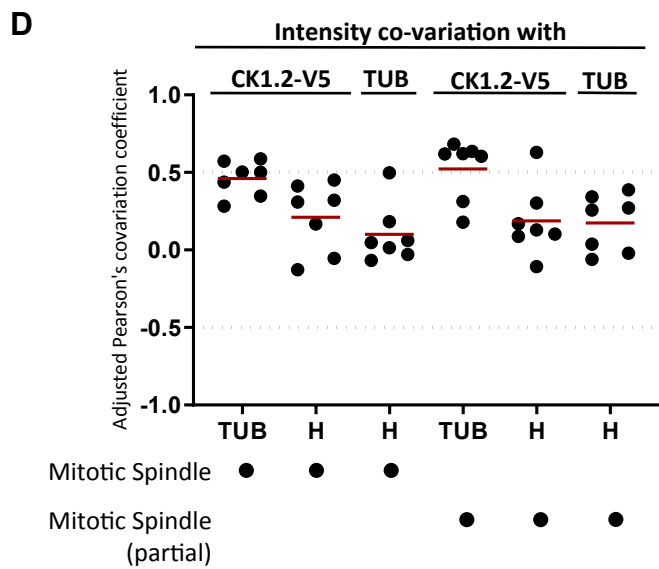

Figure 5

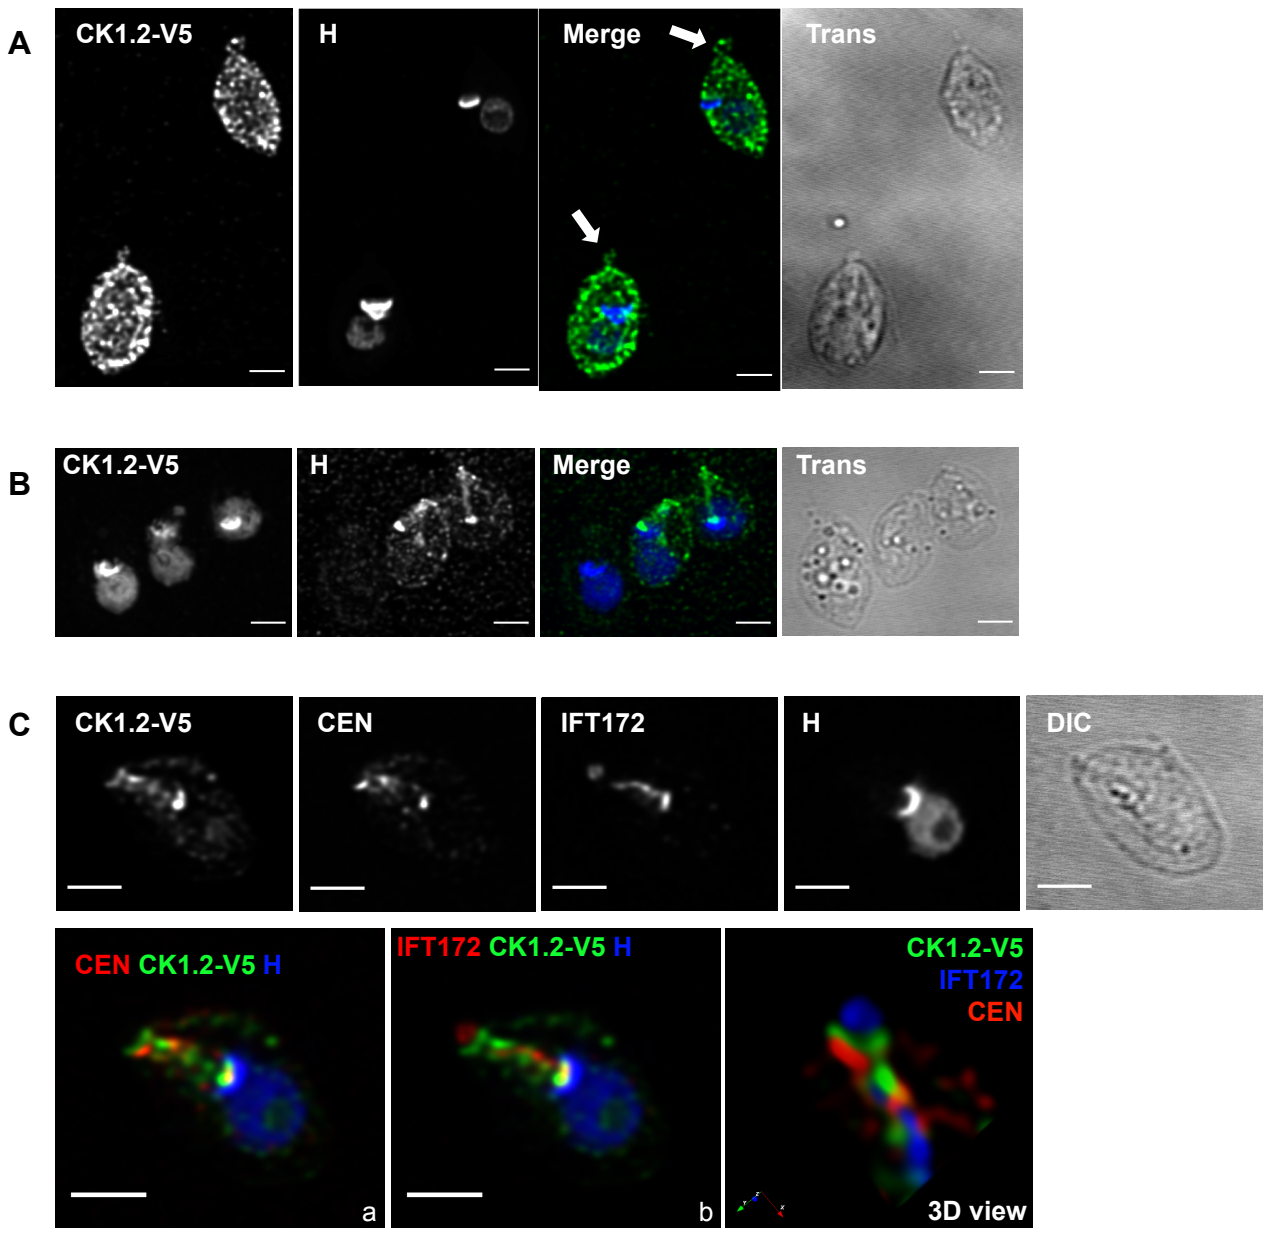

Figure 6

A

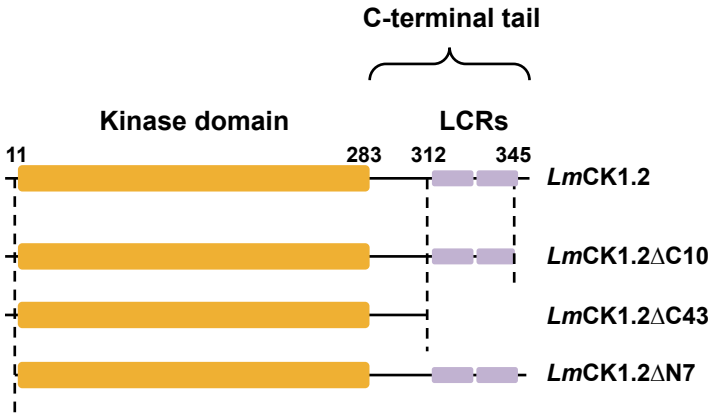

B

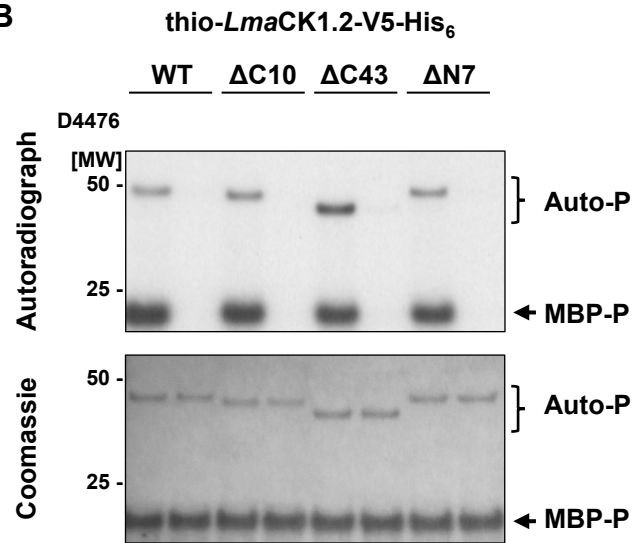

C

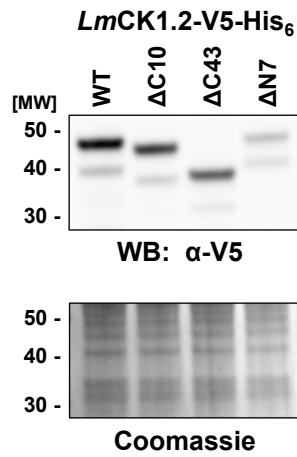

D

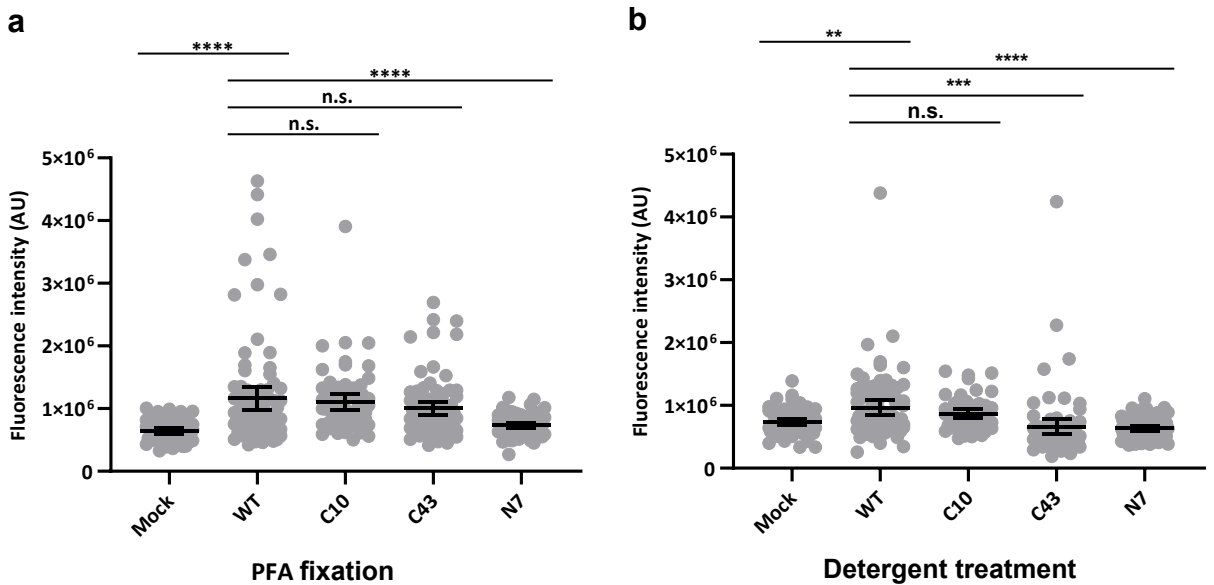

Source: https://www.biorxiv.org/content/biorxiv/early/2020/02/28/2020.02.28.969741.full.pdf
